# Supplementary material for: Palladium-catalysed direct heteroarylation of bromobenzenes bearing SO2R substituents at C2 or C4
Source: Royal Society of Chemistry journal article supplement (doi:10.1039/c3ra40769a), 2013-01-01

## Supplementary material

---

### **Palladium-Catalysed Direct Heteroarylation of Bromobenzenes Bearing SO<sub>2</sub>R Substituents at C2 or C4**

Charles Beromeo Bheeter,<sup>[a]</sup> Rongwei Jin,<sup>[a]</sup> Jitendra K. Bera,<sup>[b]</sup> Henri Doucet<sup>\*[a]</sup>

[a] C. B. Bheeter, R. Jin, Prof. J. K. Bera, Dr. H. Doucet

Institut Sciences Chimiques de Rennes, UMR 6226 CNRS-Université de Rennes 1

"Organometalliques: Matériaux et Catalyse", Campus de Beaulieu, 35042 Rennes, France.

Tel: +(33) 0223236384; Fax: +(33) 0223236939.

E-mail: henri.doucet@univ-rennes1.fr

[b] Department of Chemistry, Indian Institute of Technology Kanpur, 208016 Kanpur, India.

---

**Copies of <sup>1</sup>H and <sup>13</sup>C NMR spectra of new compounds**

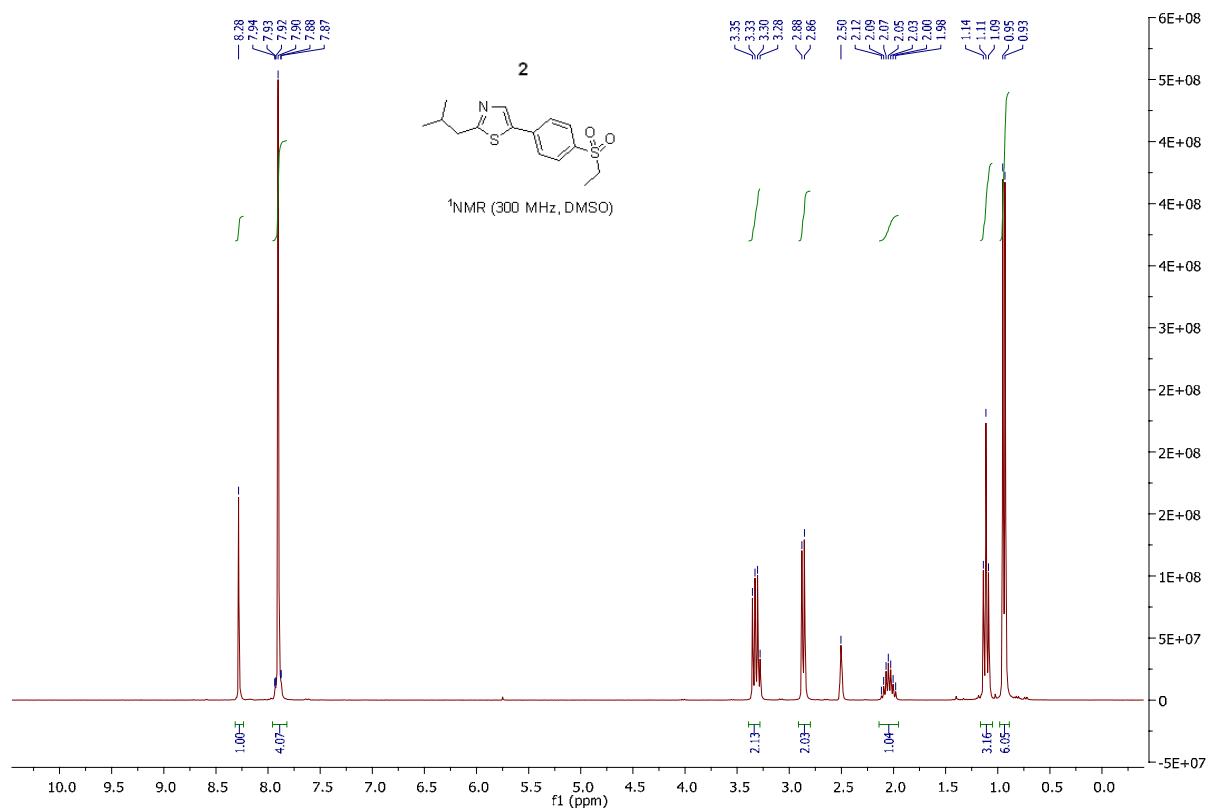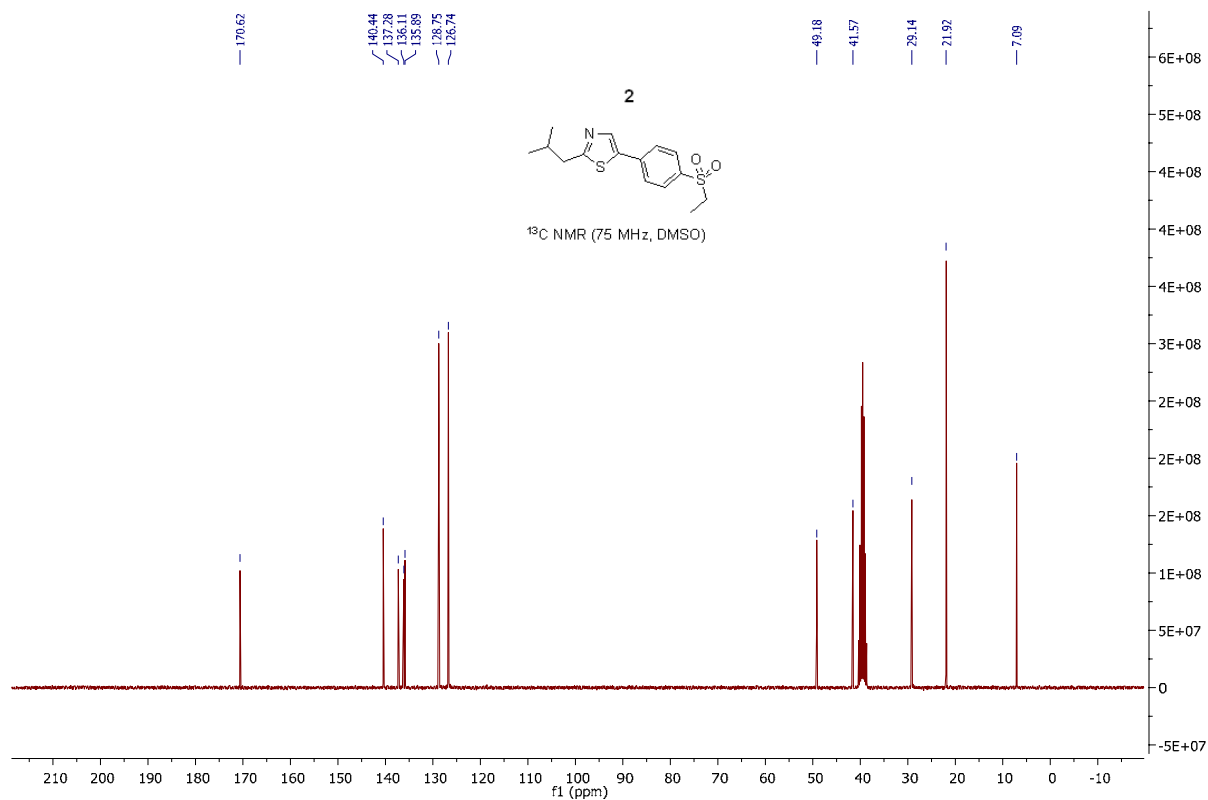

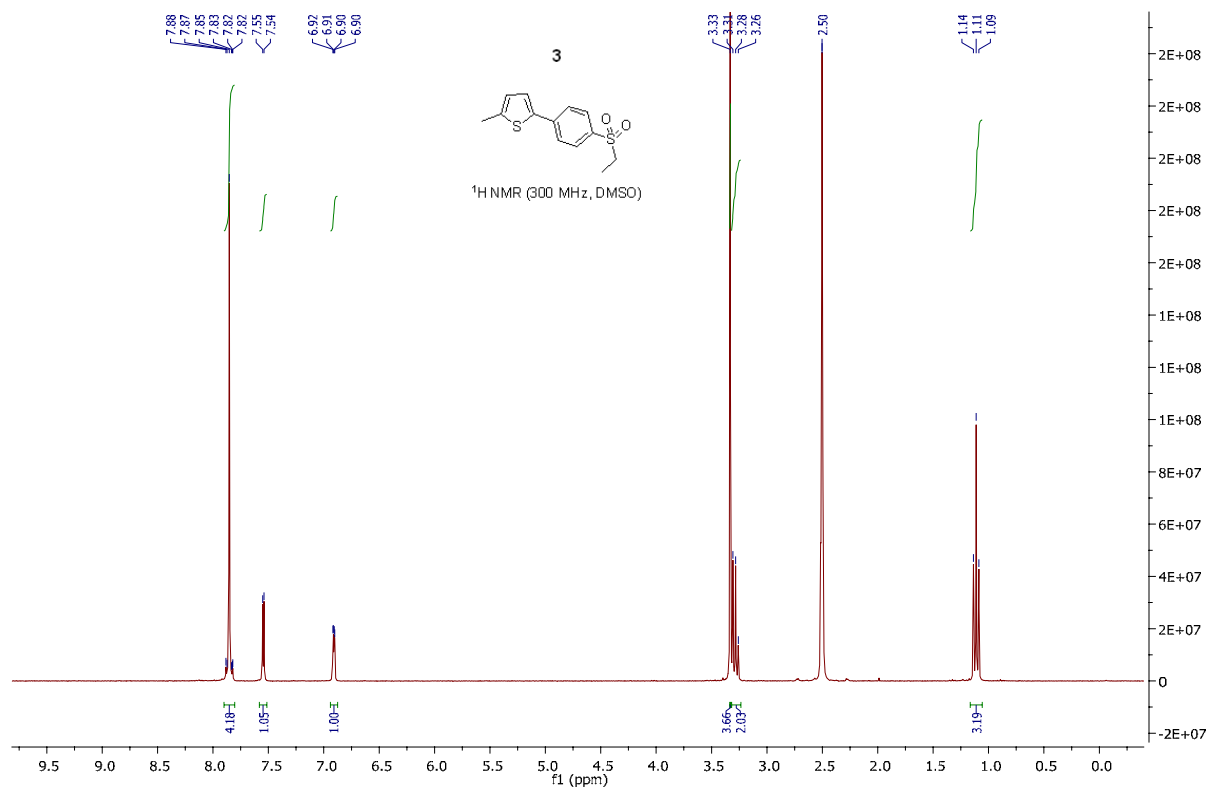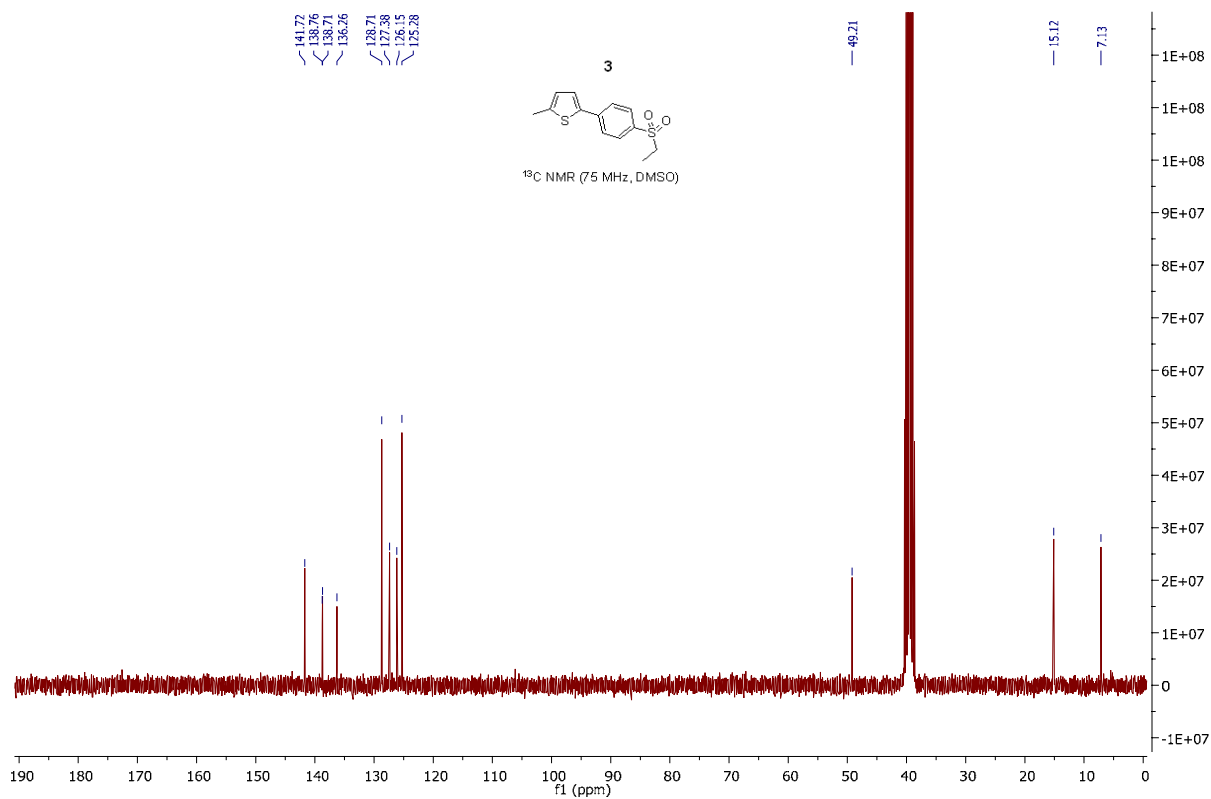

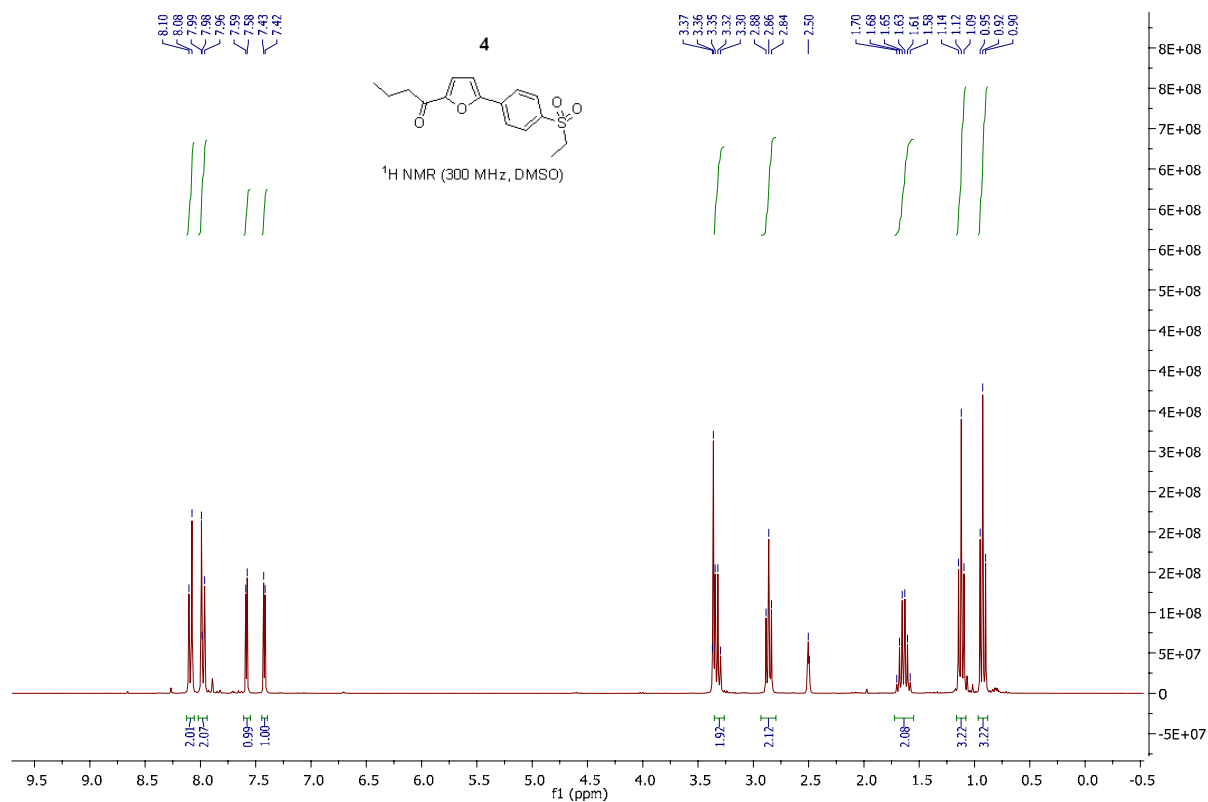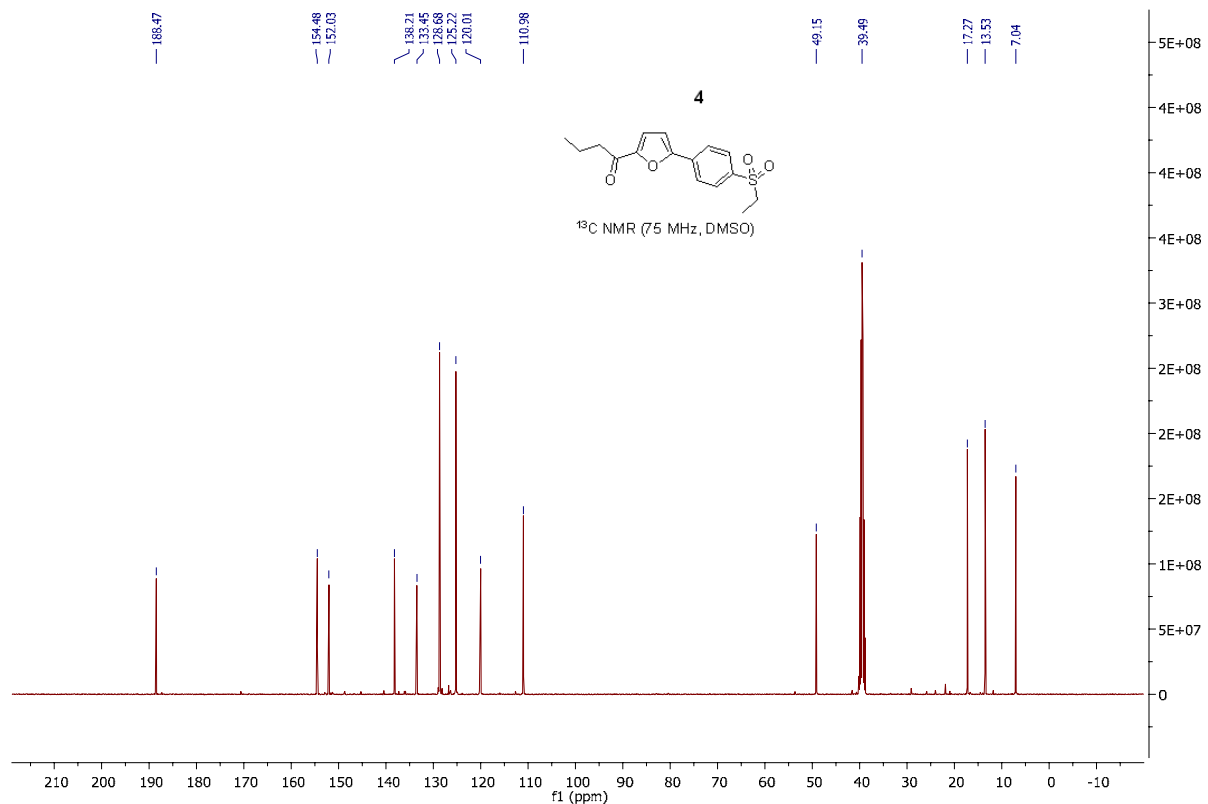

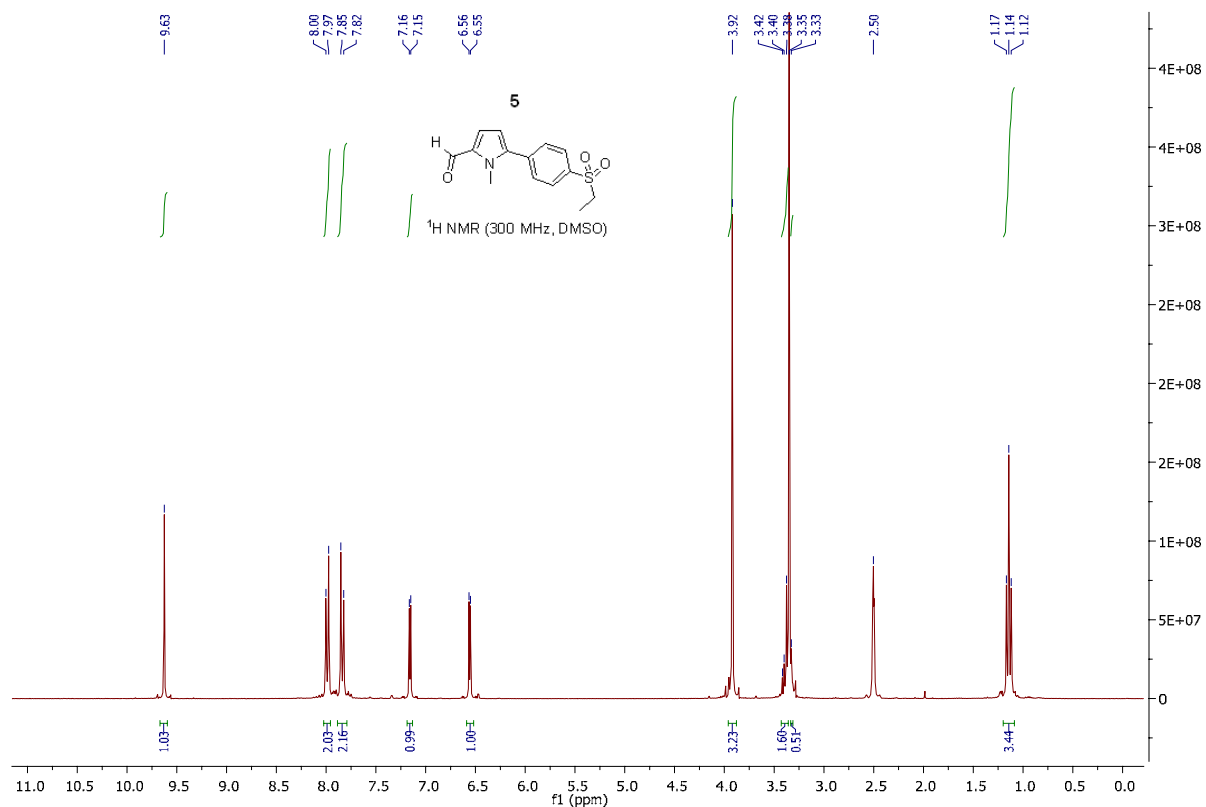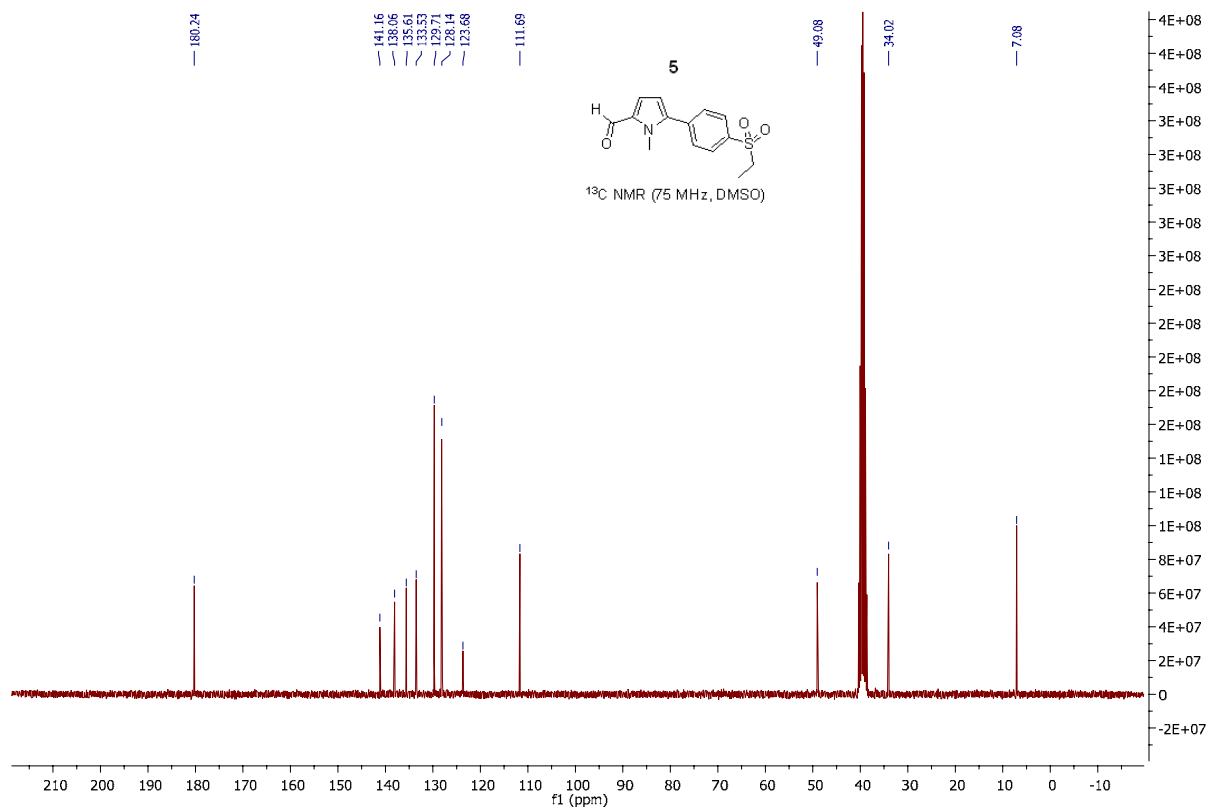

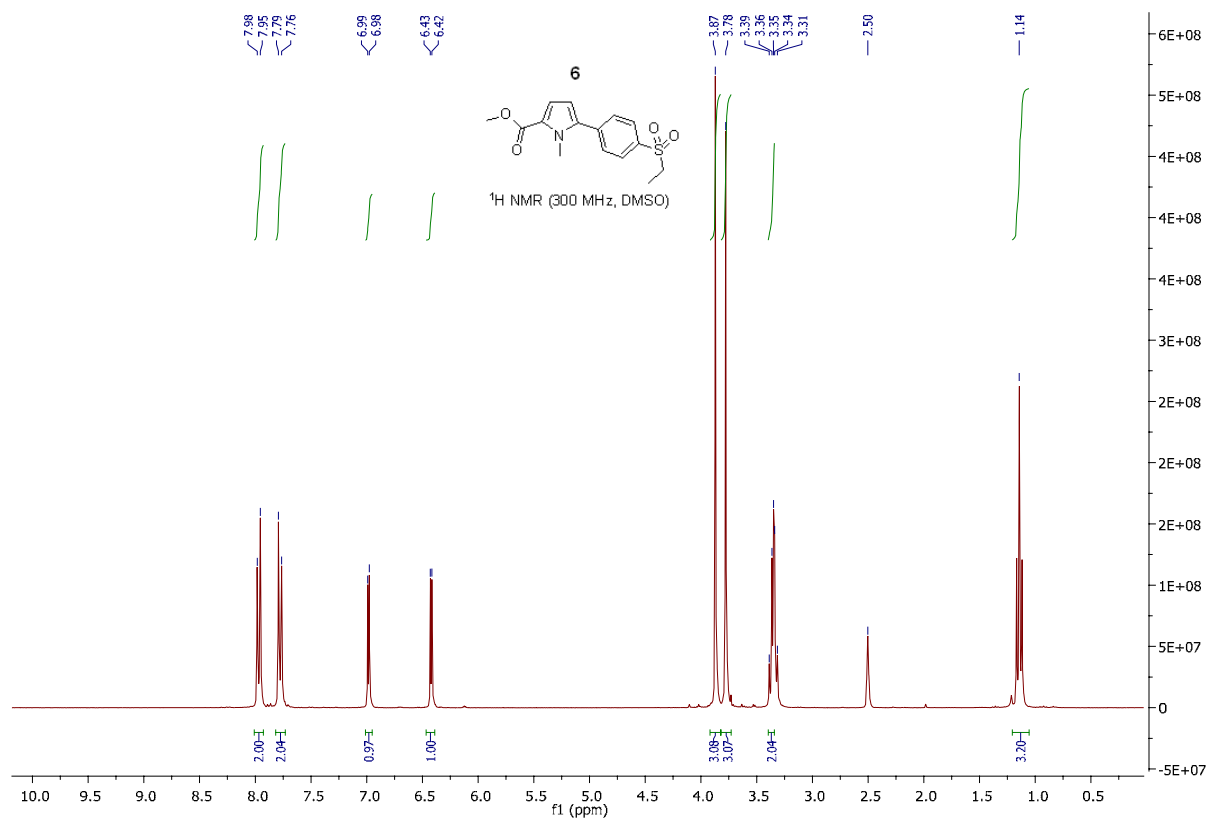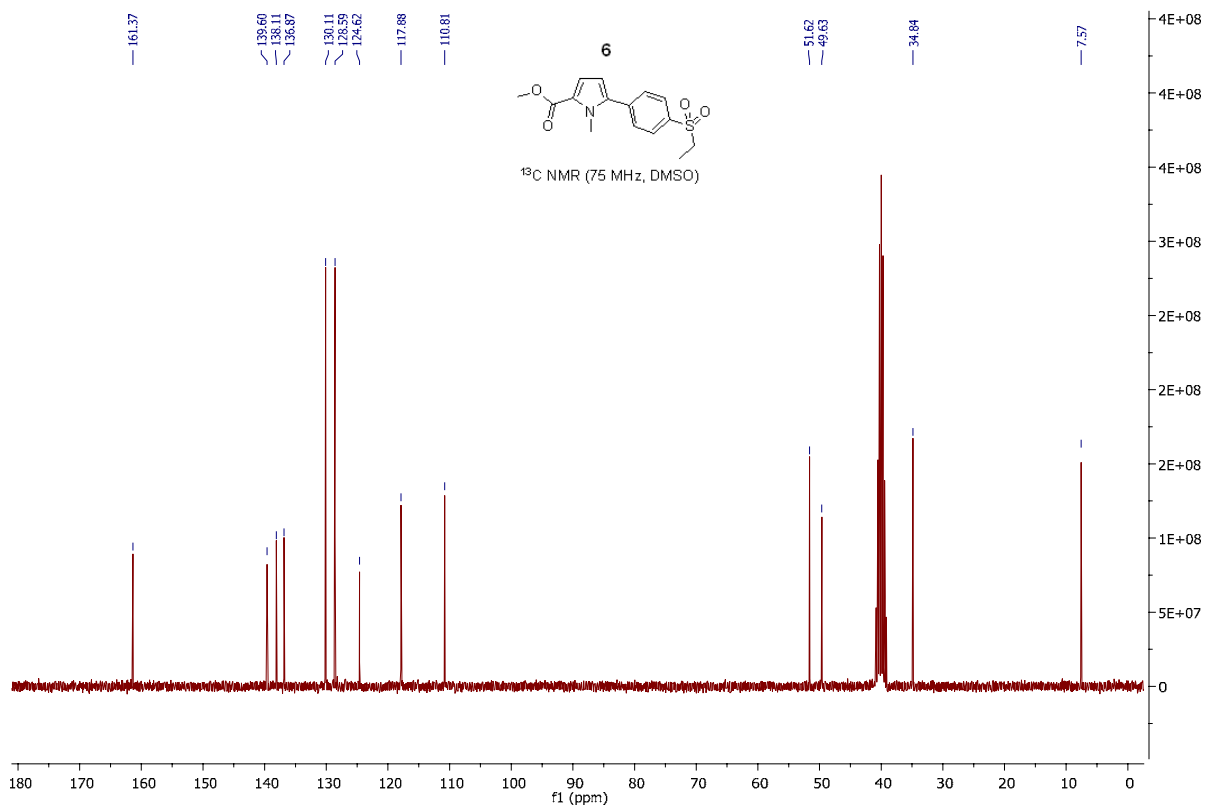

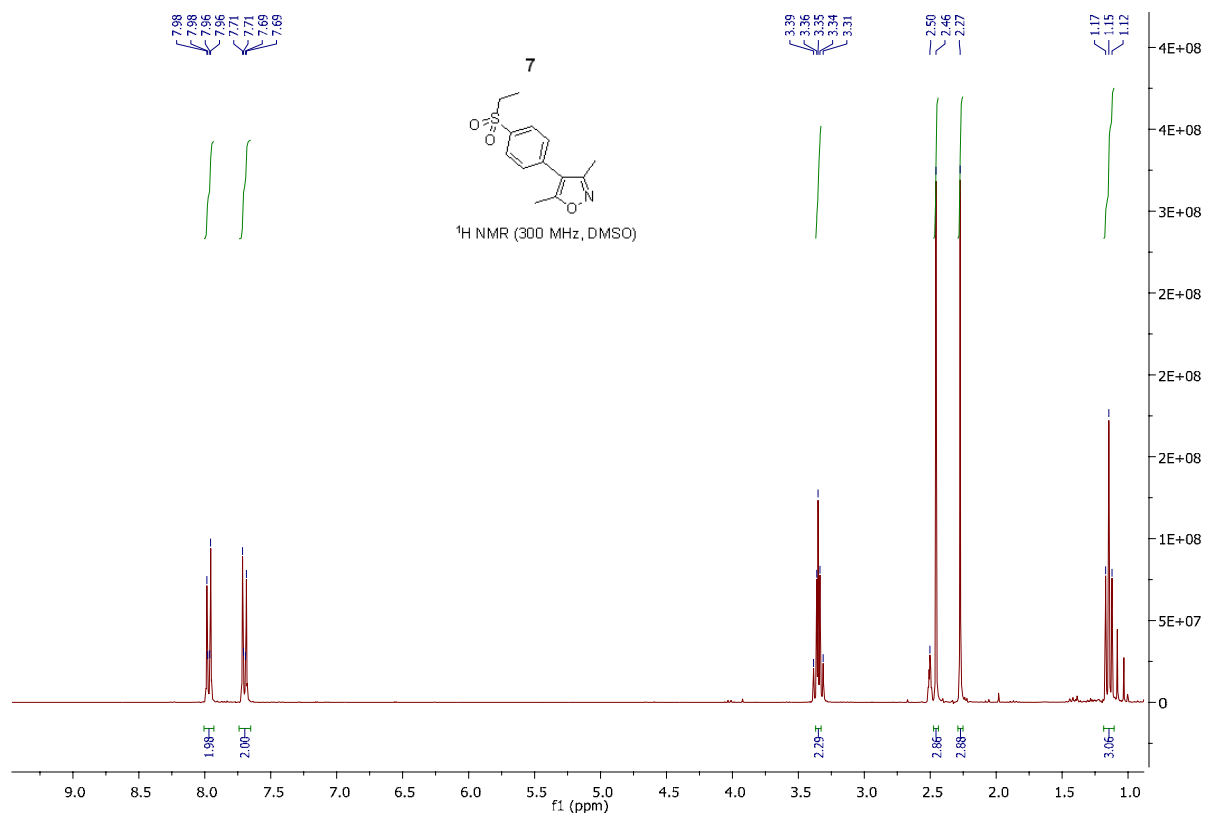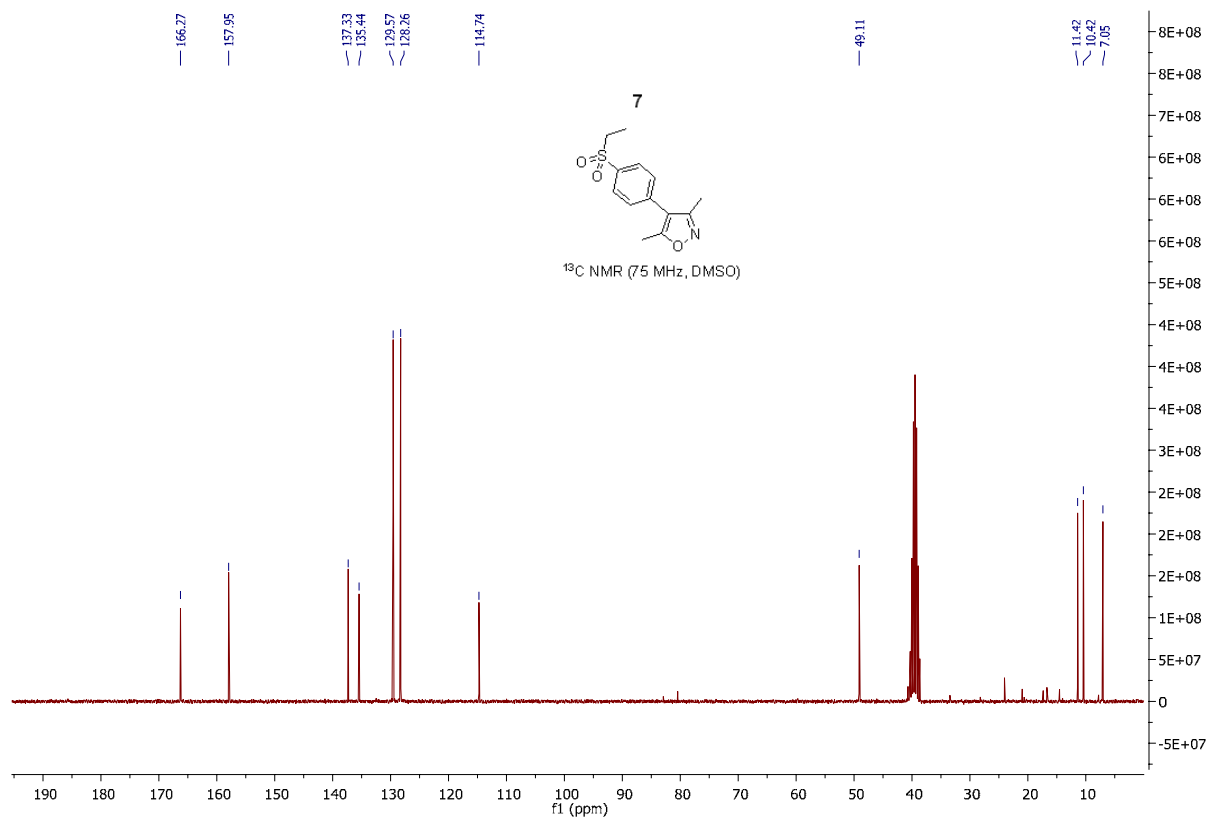

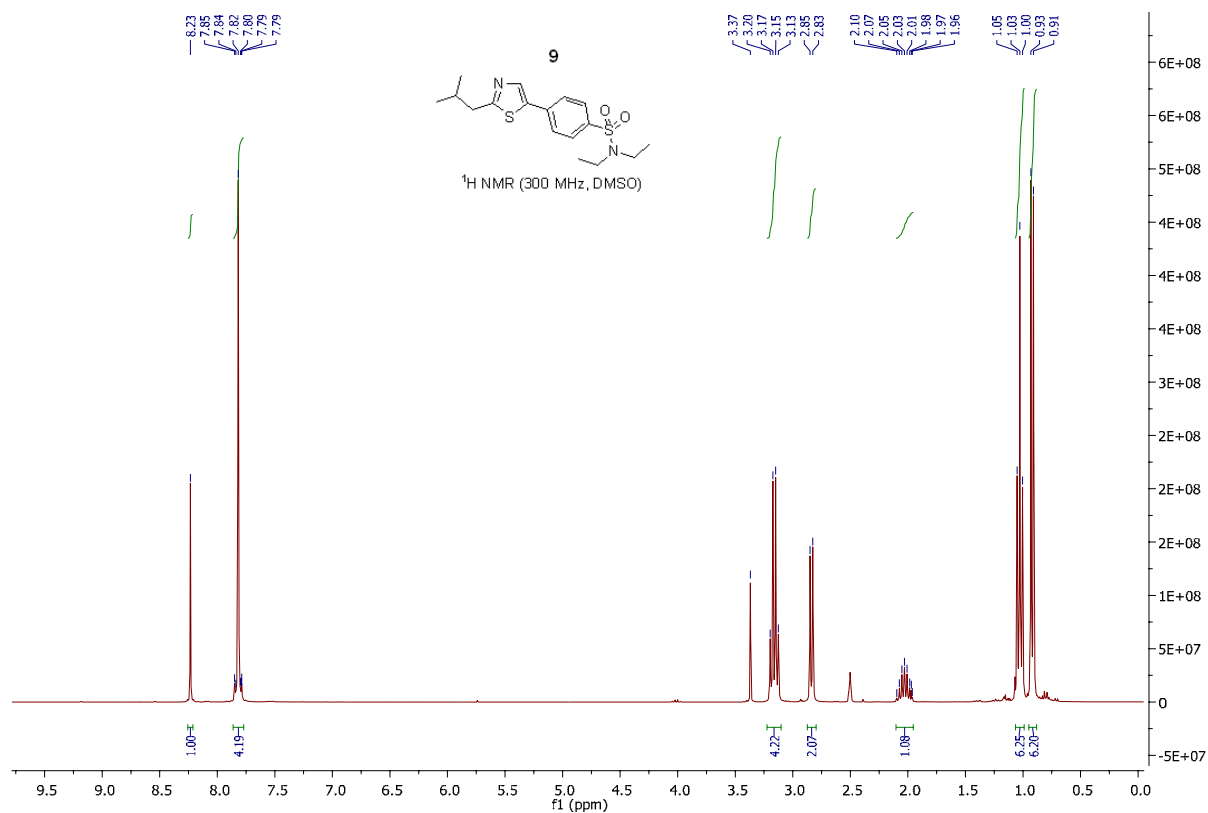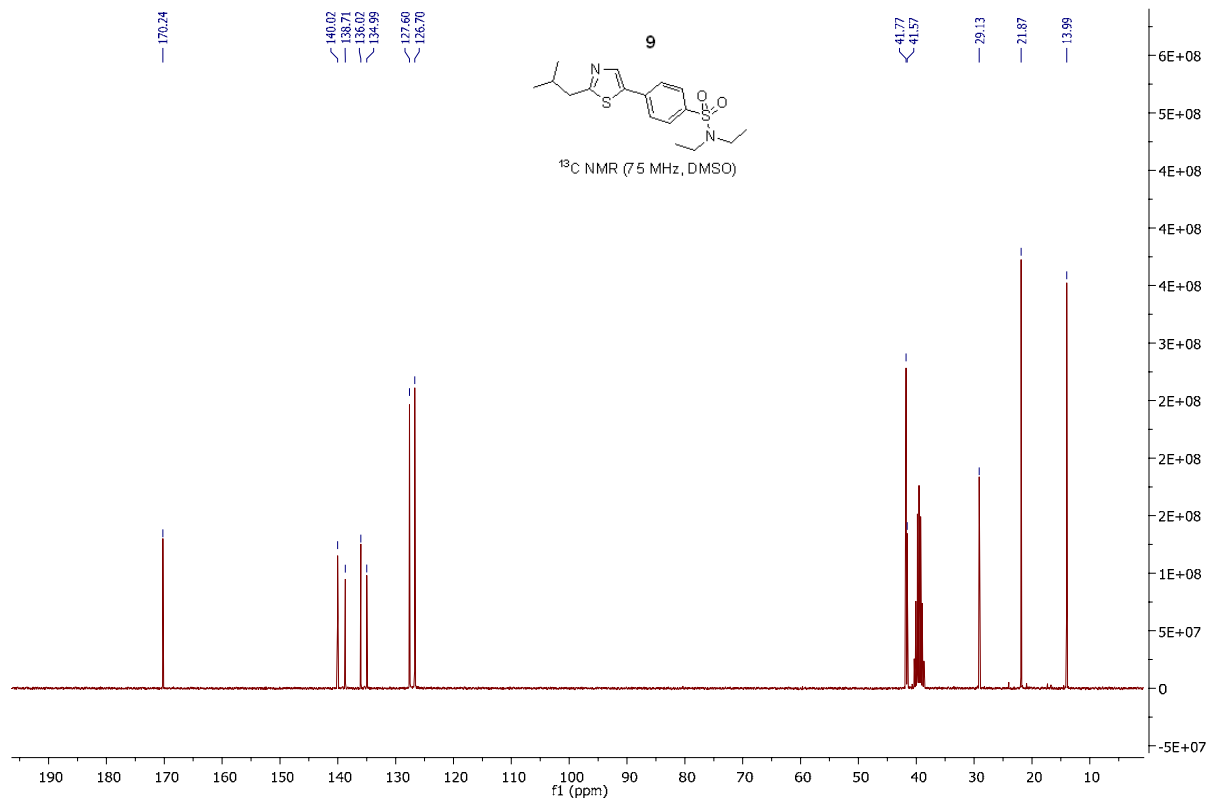

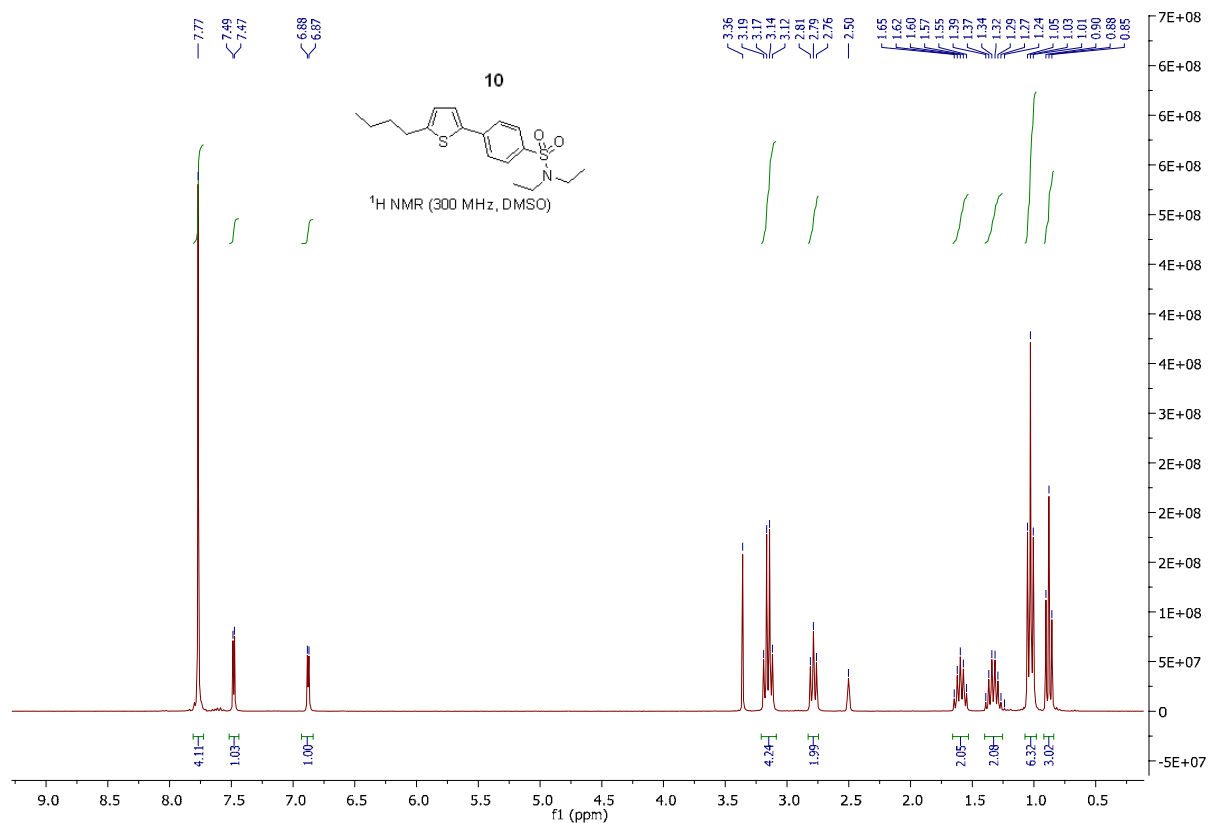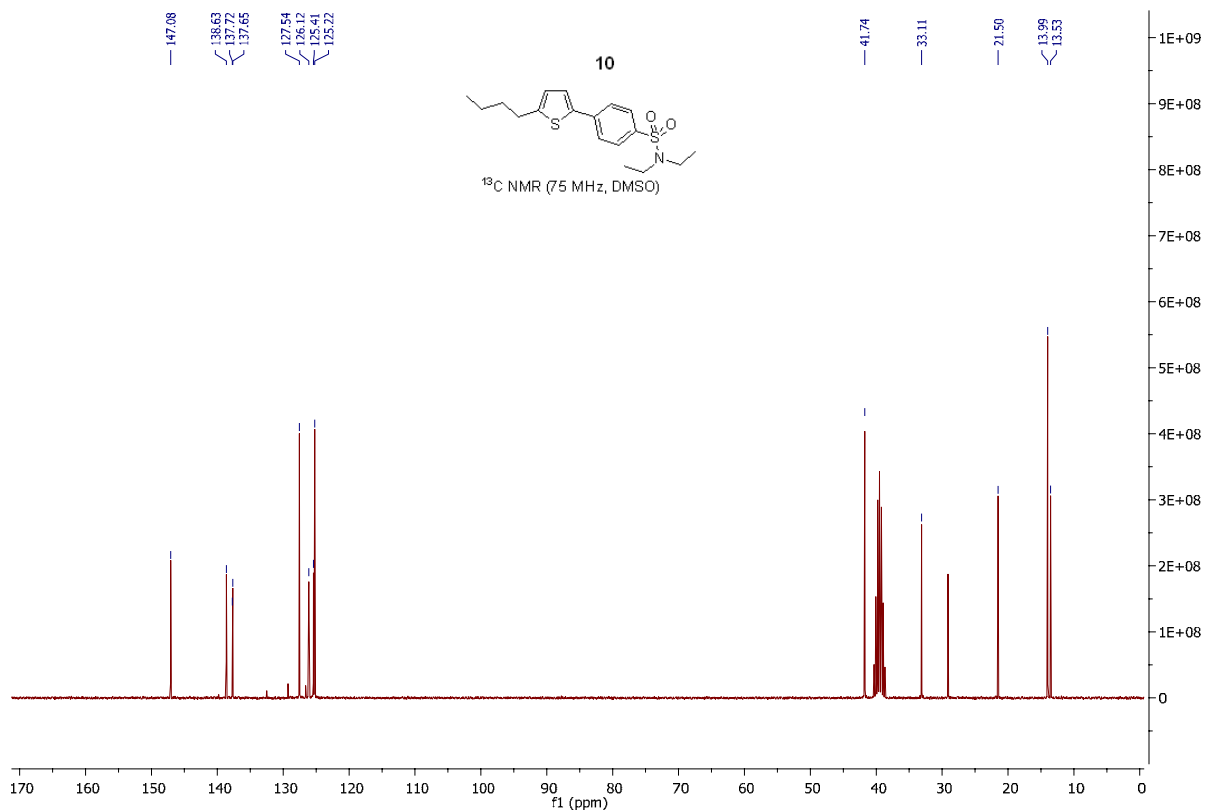

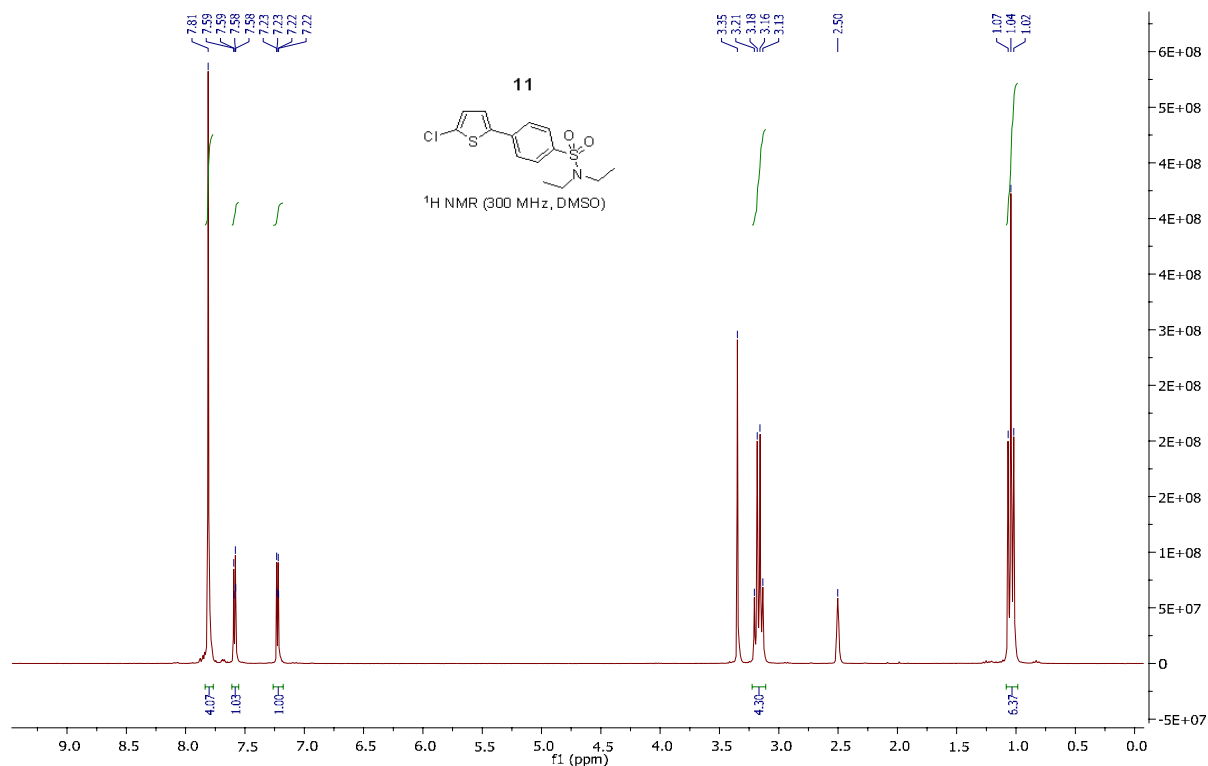

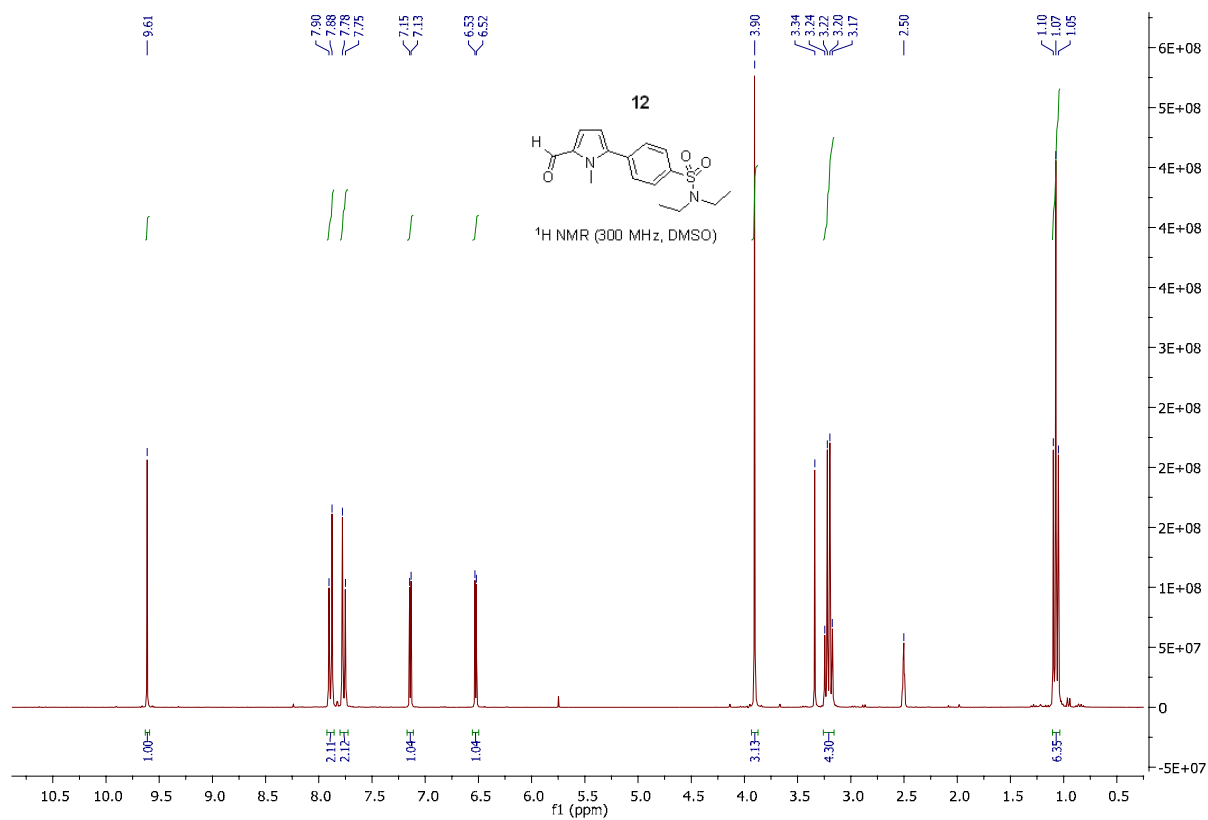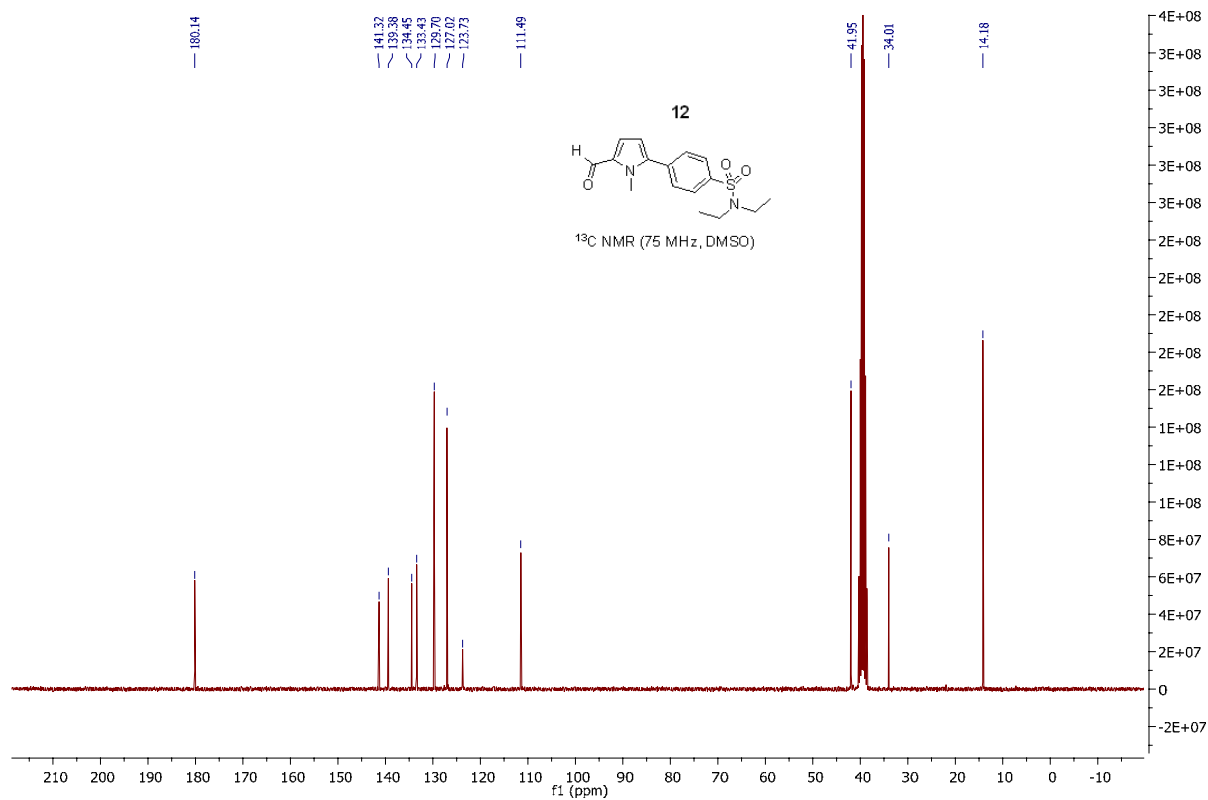

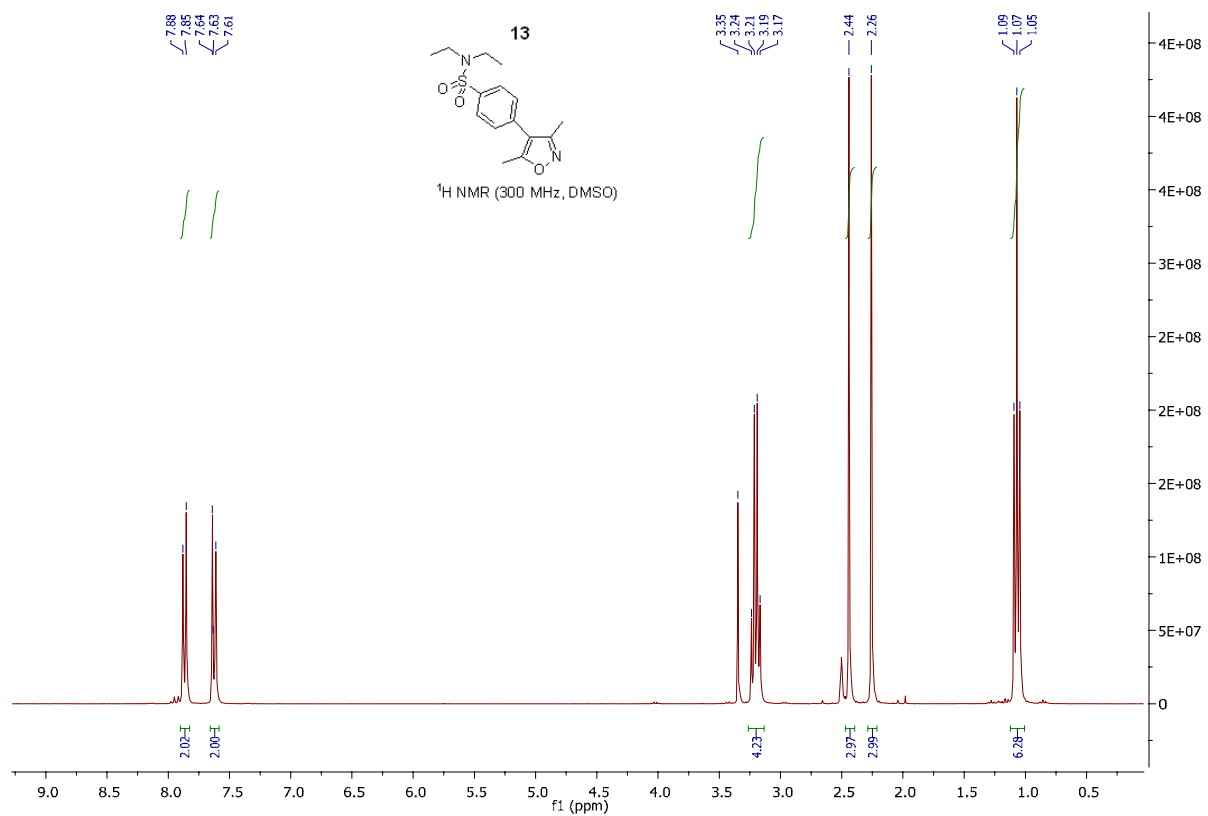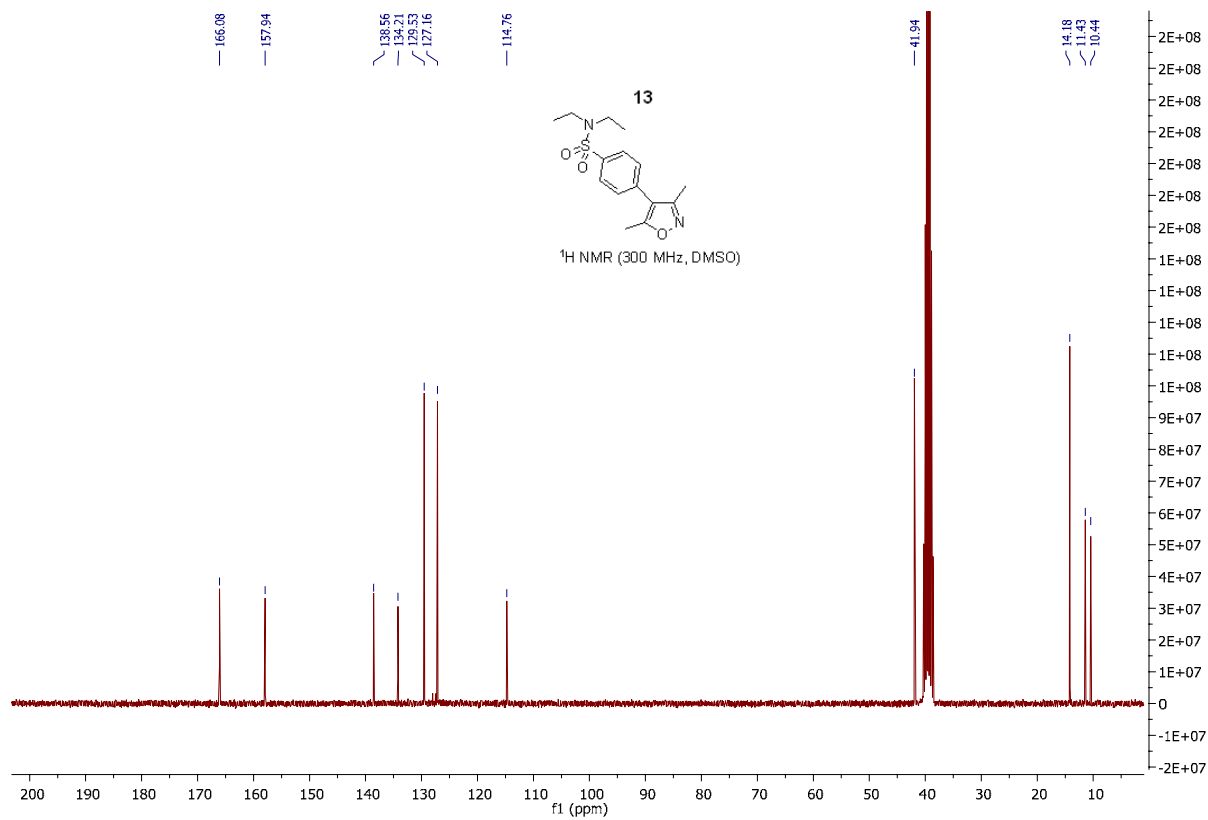

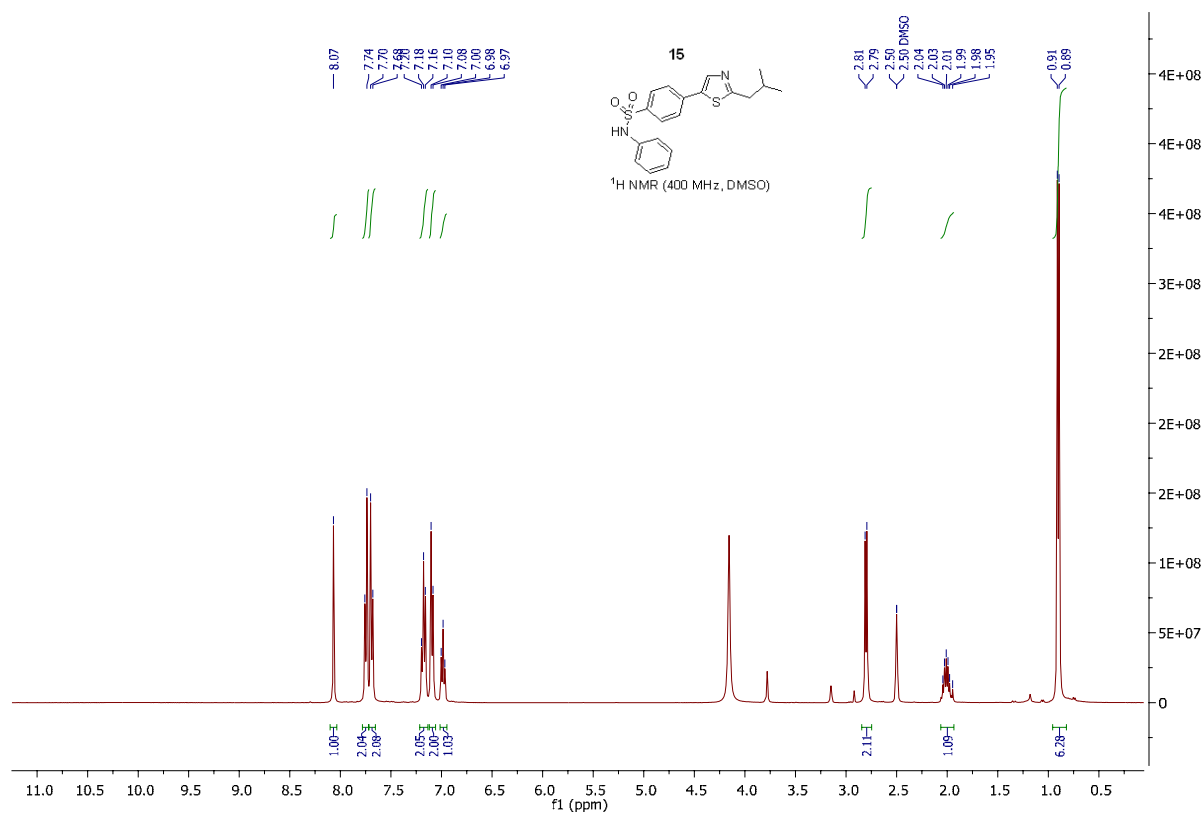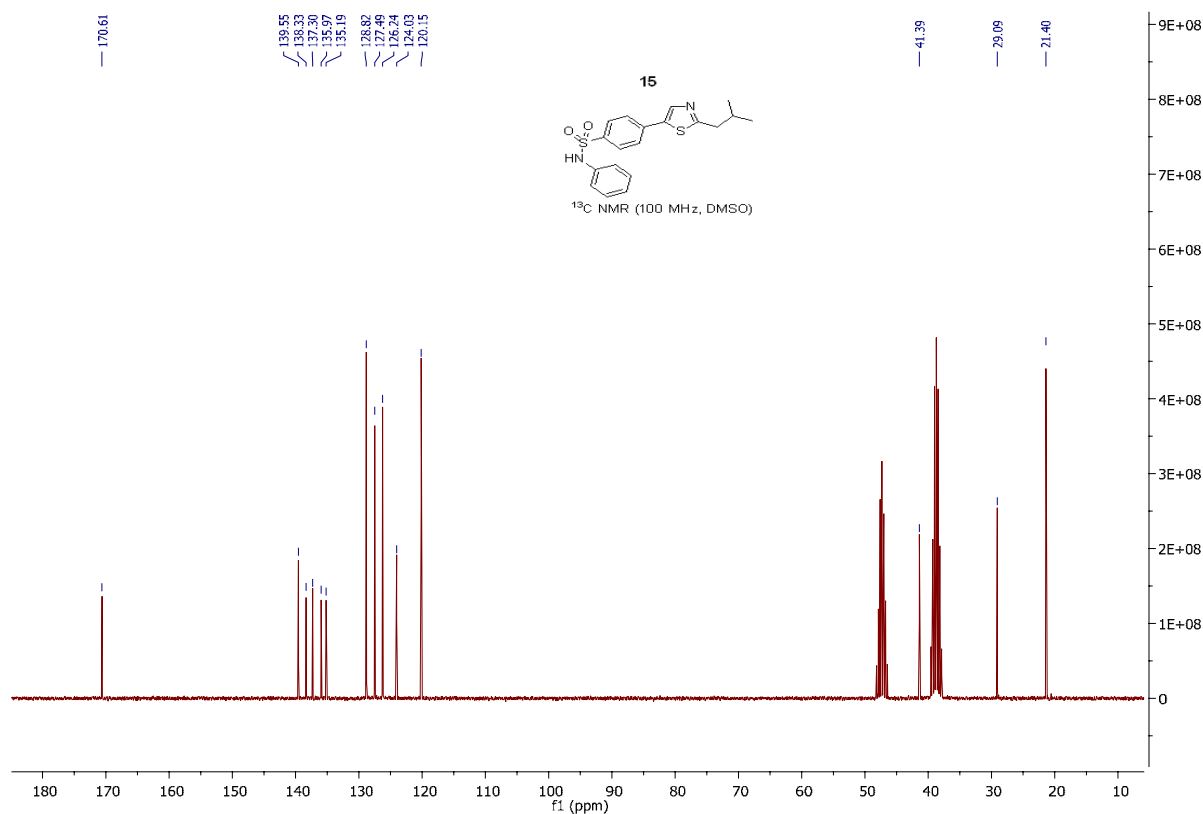

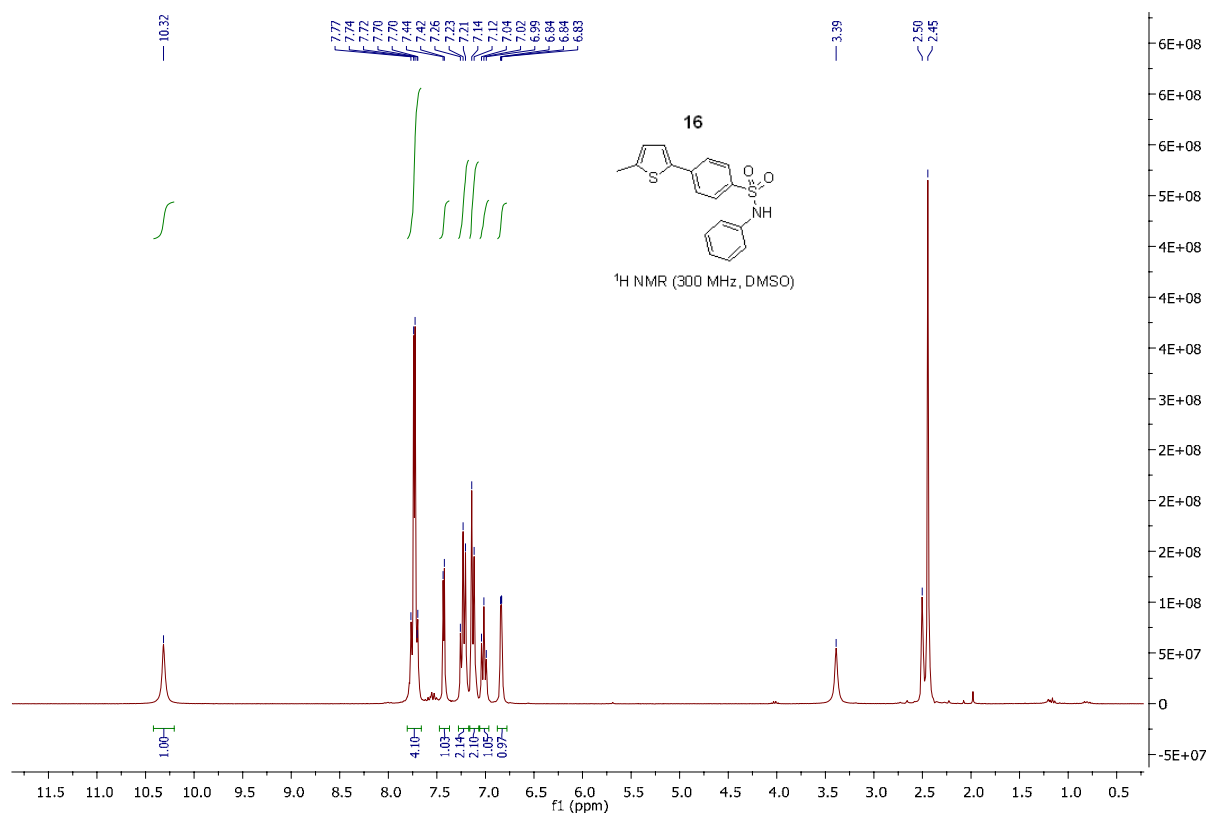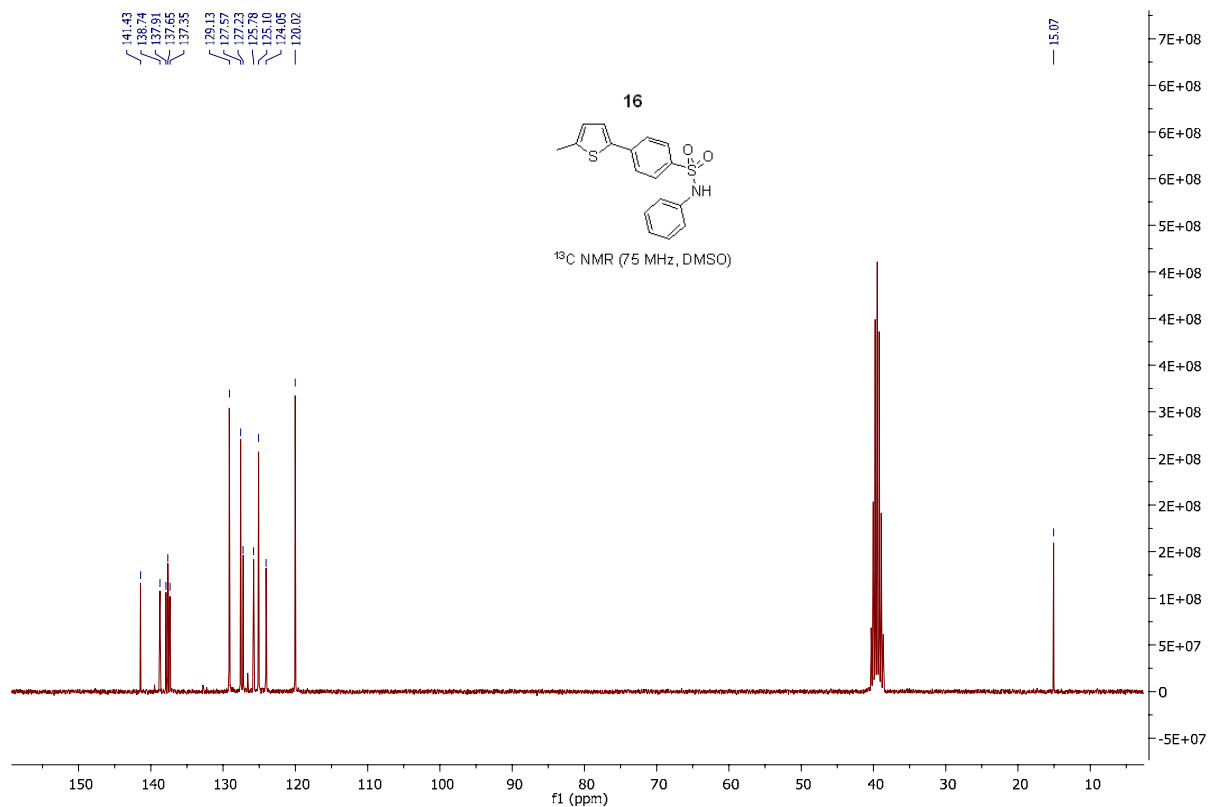

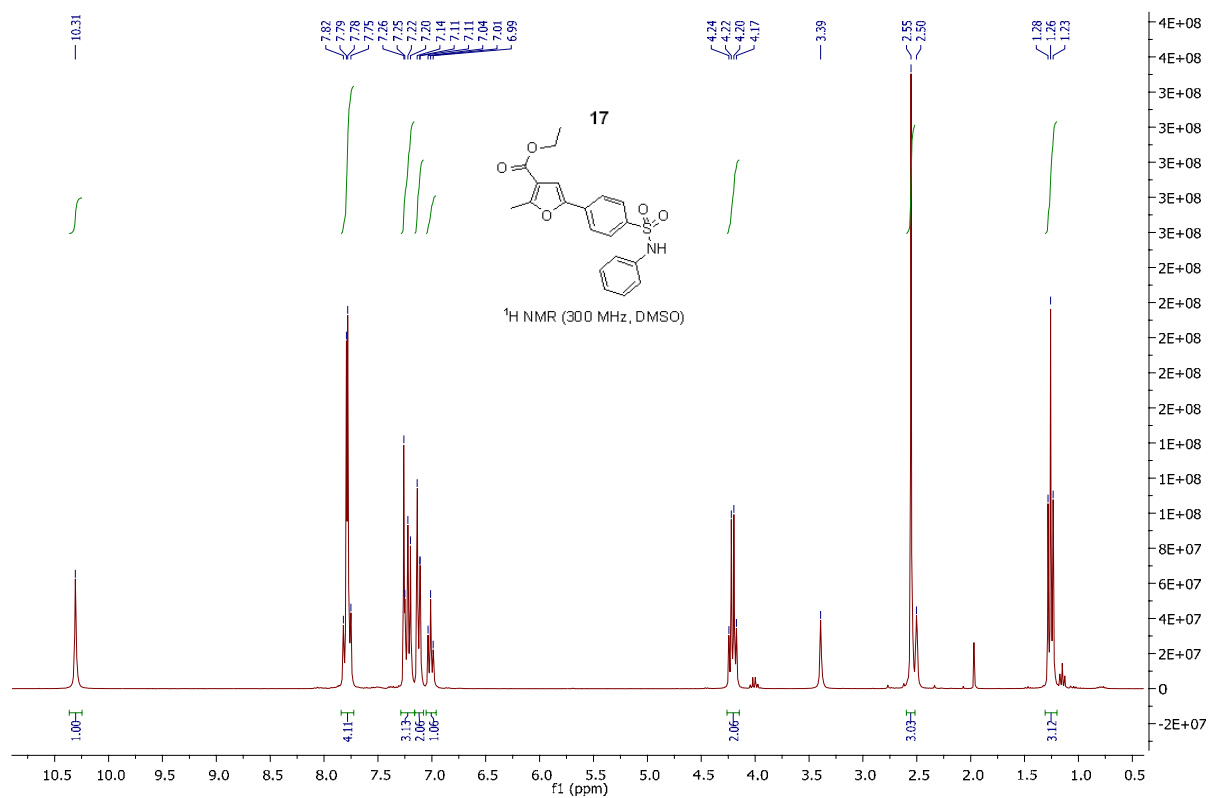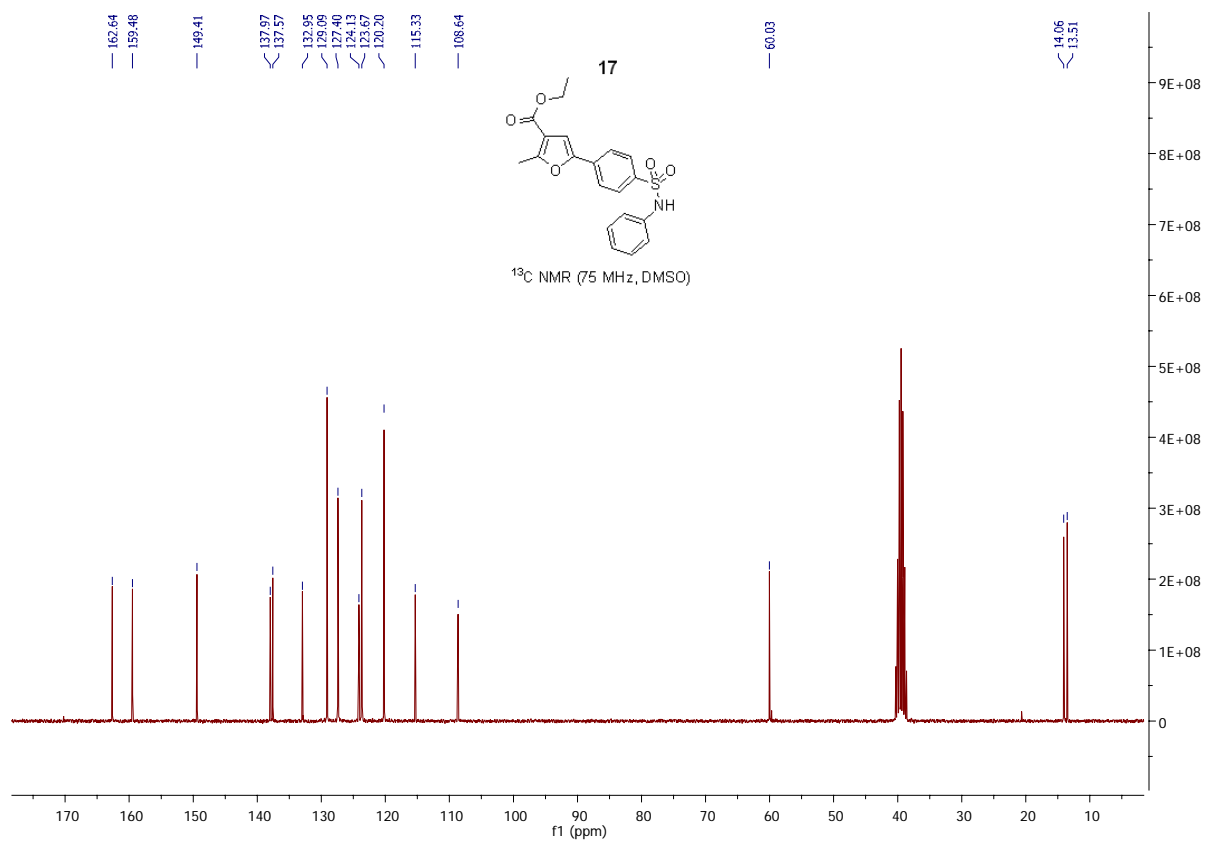

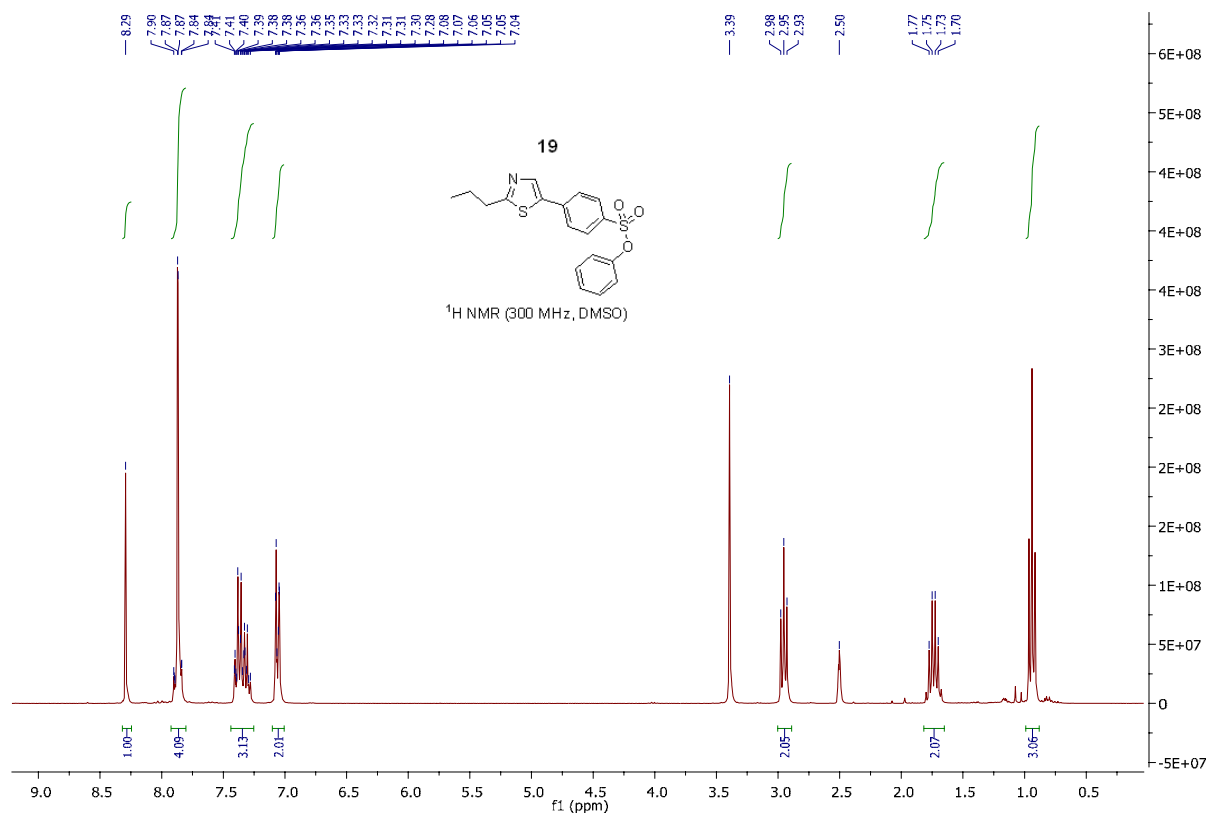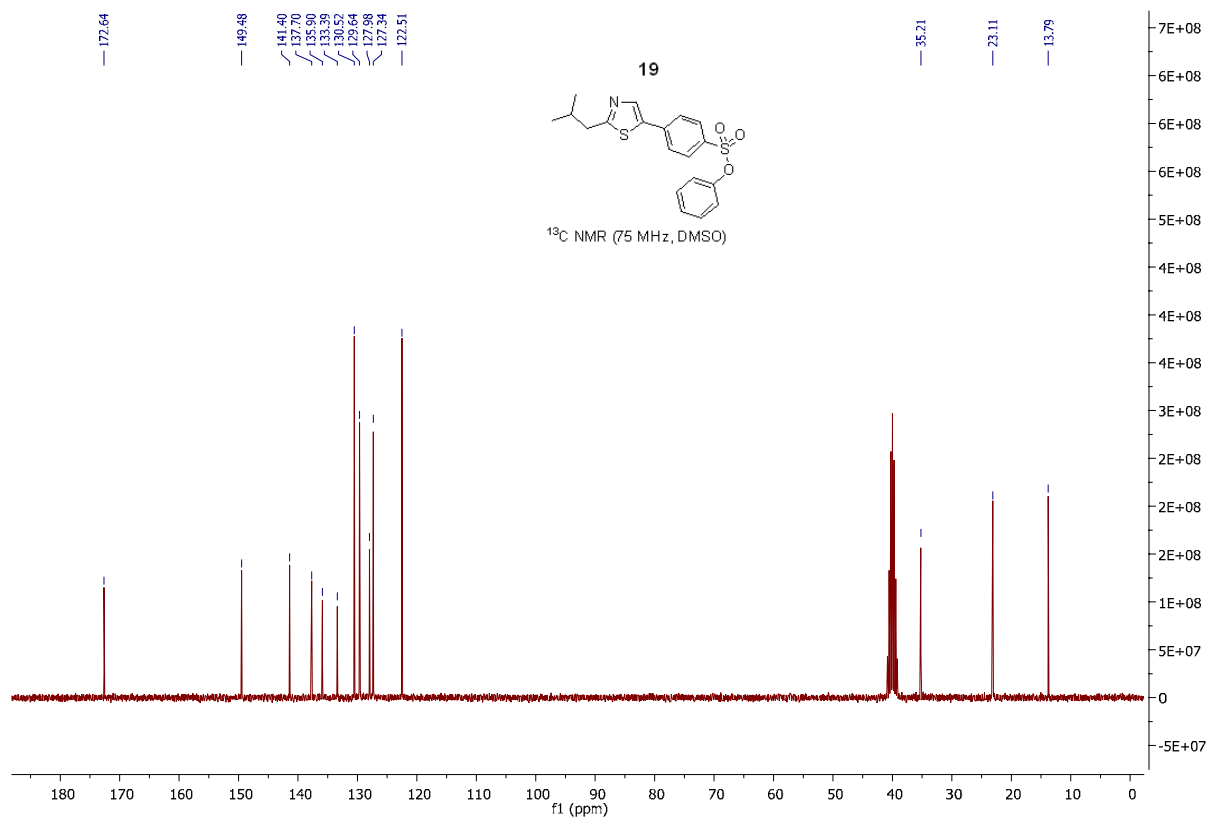

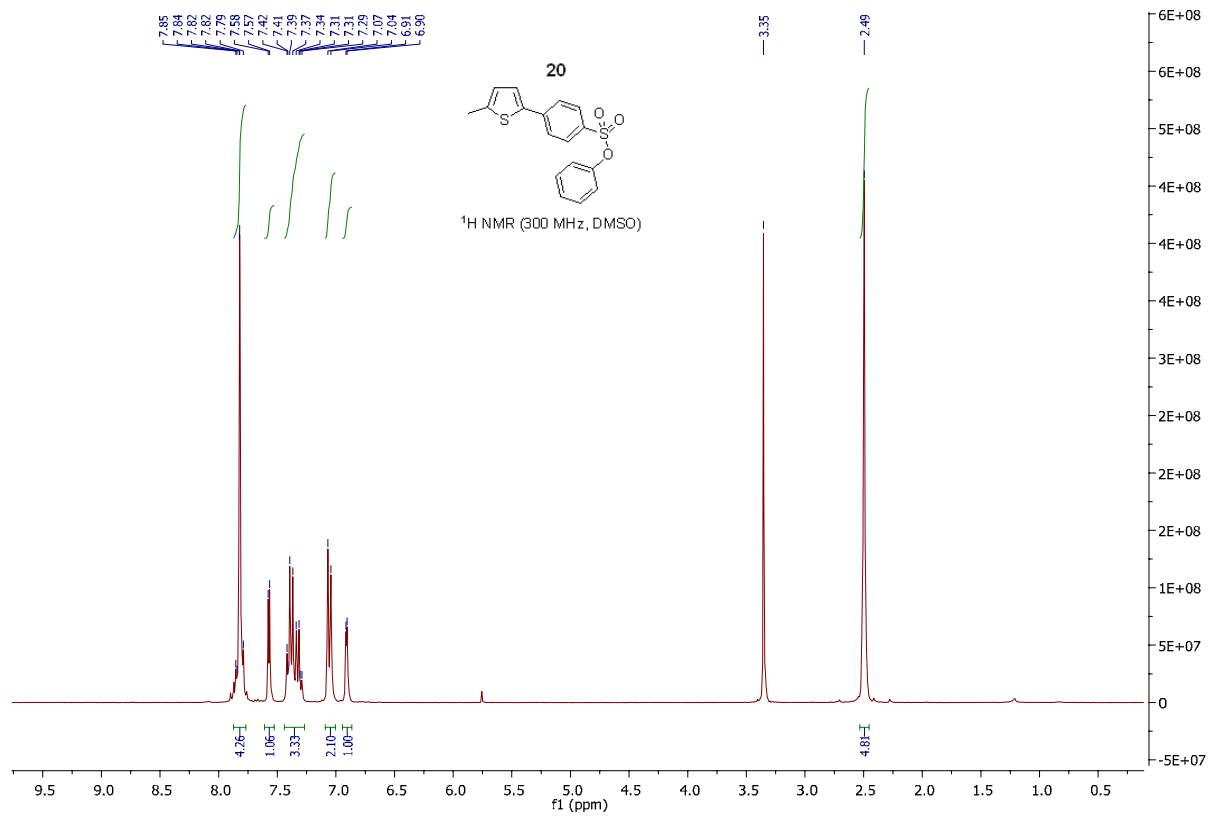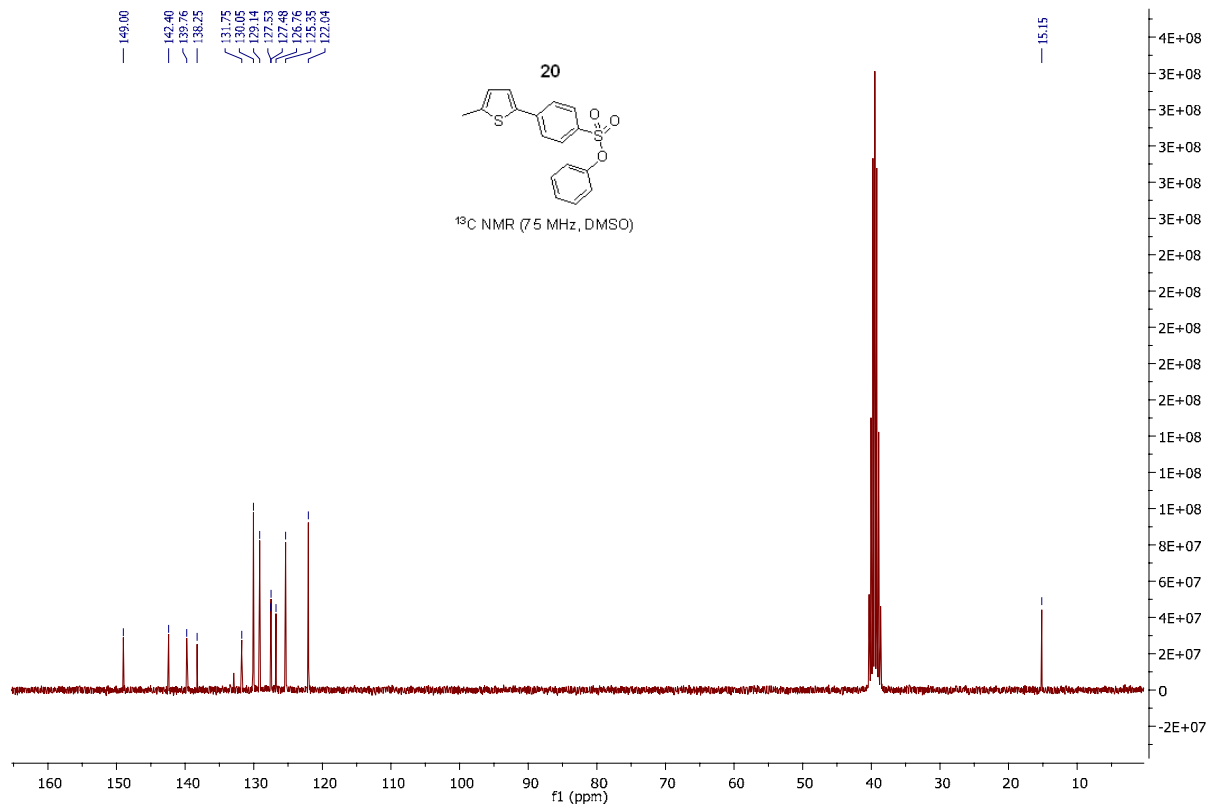

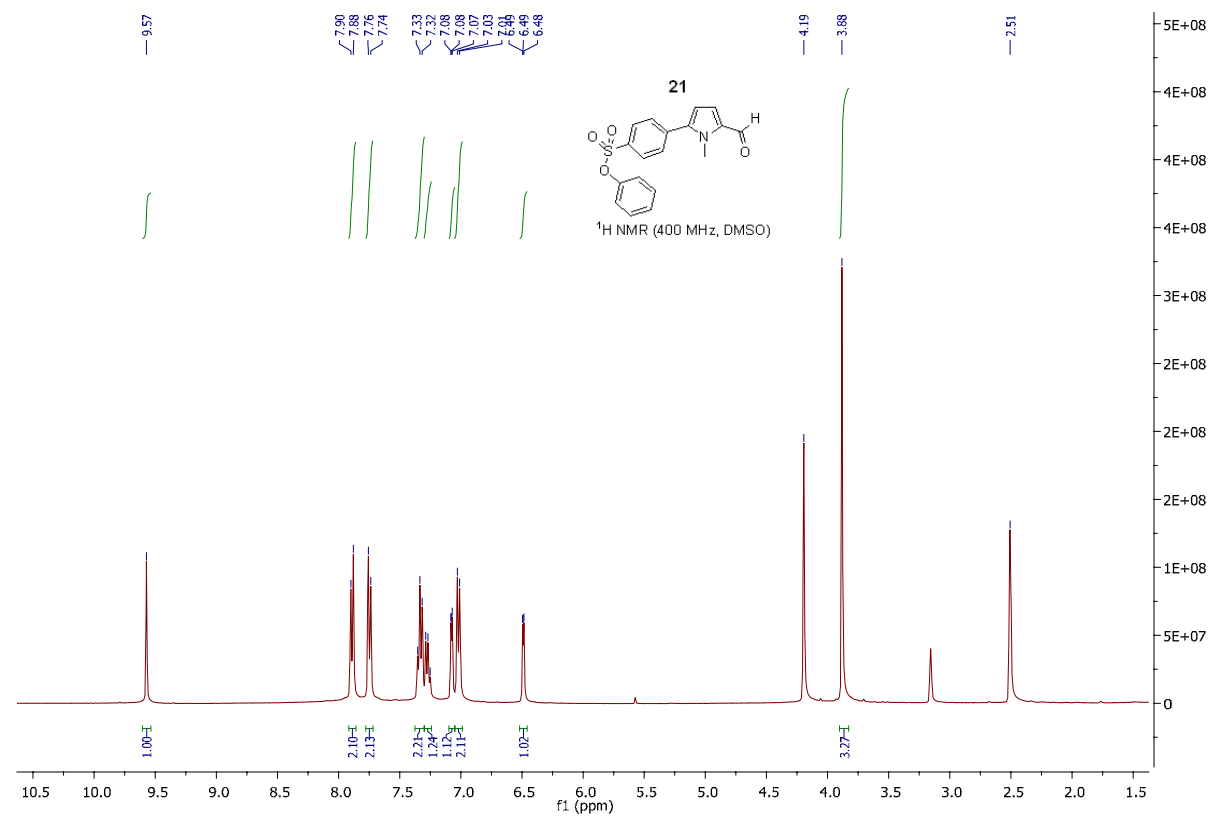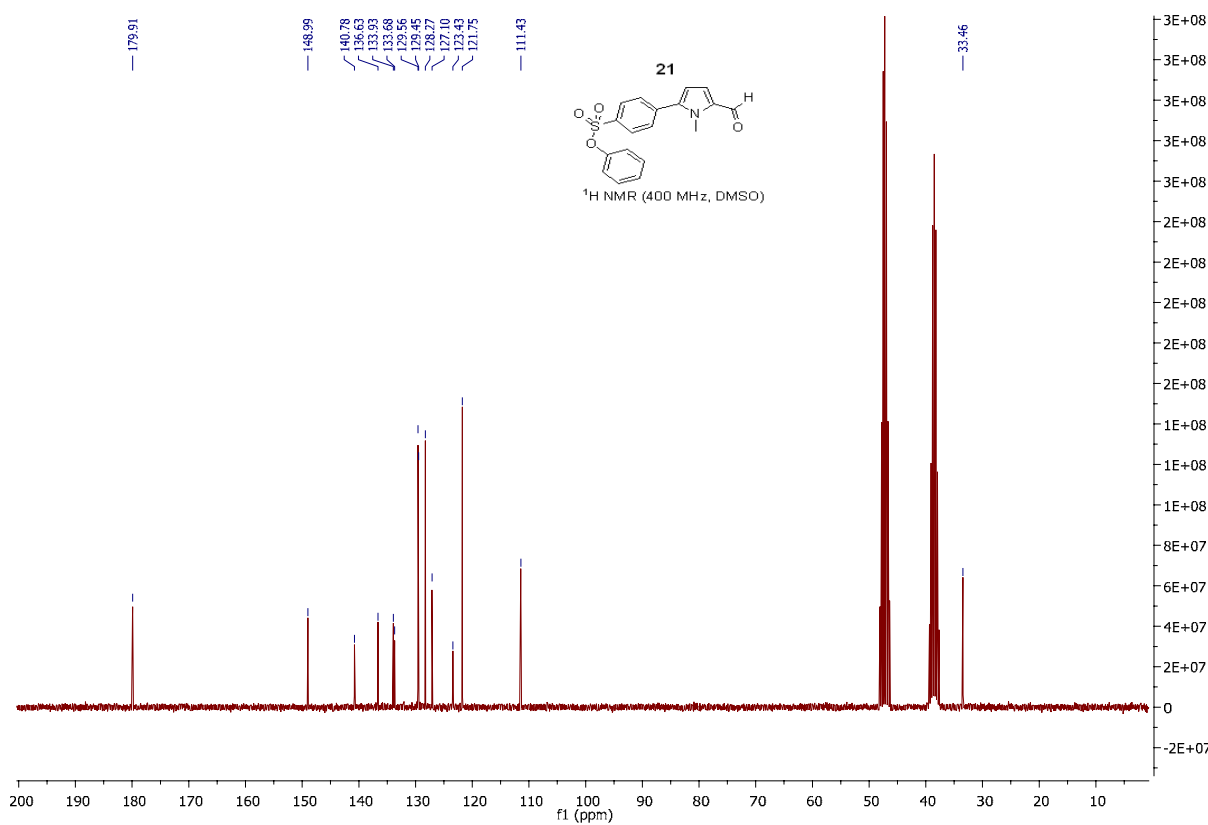

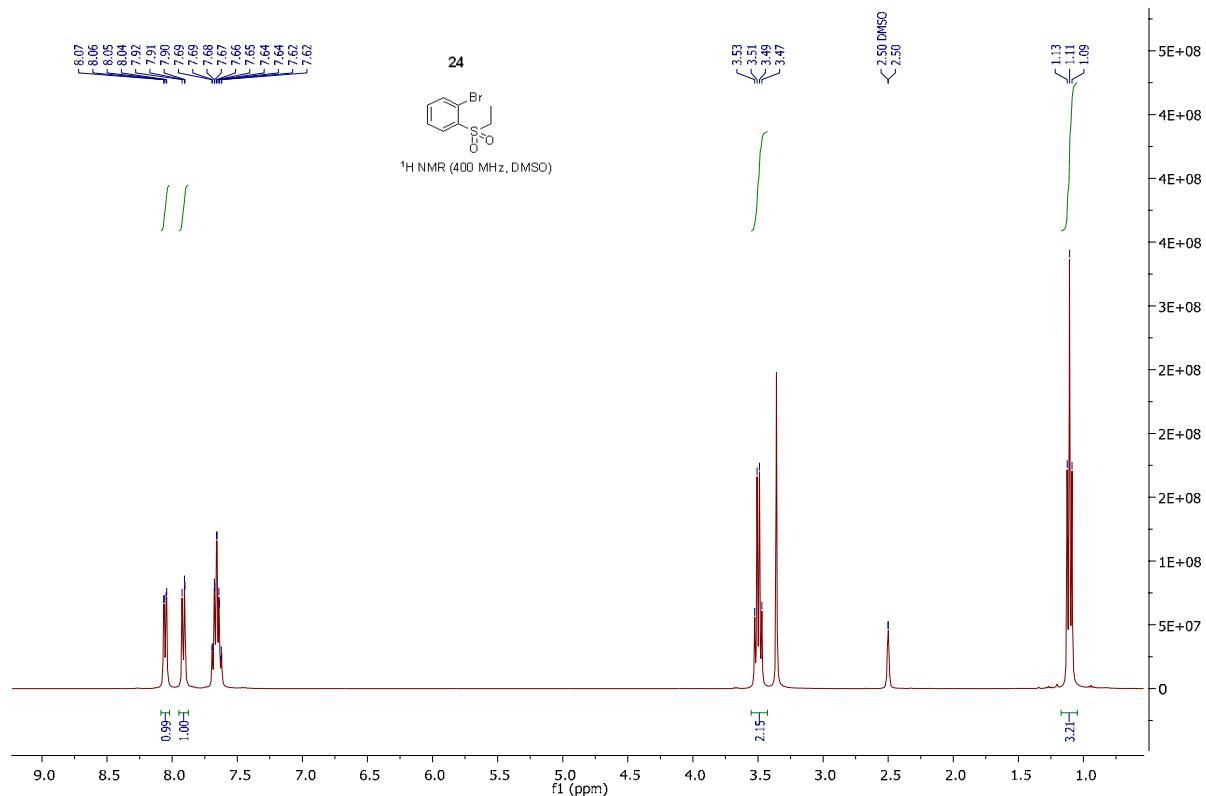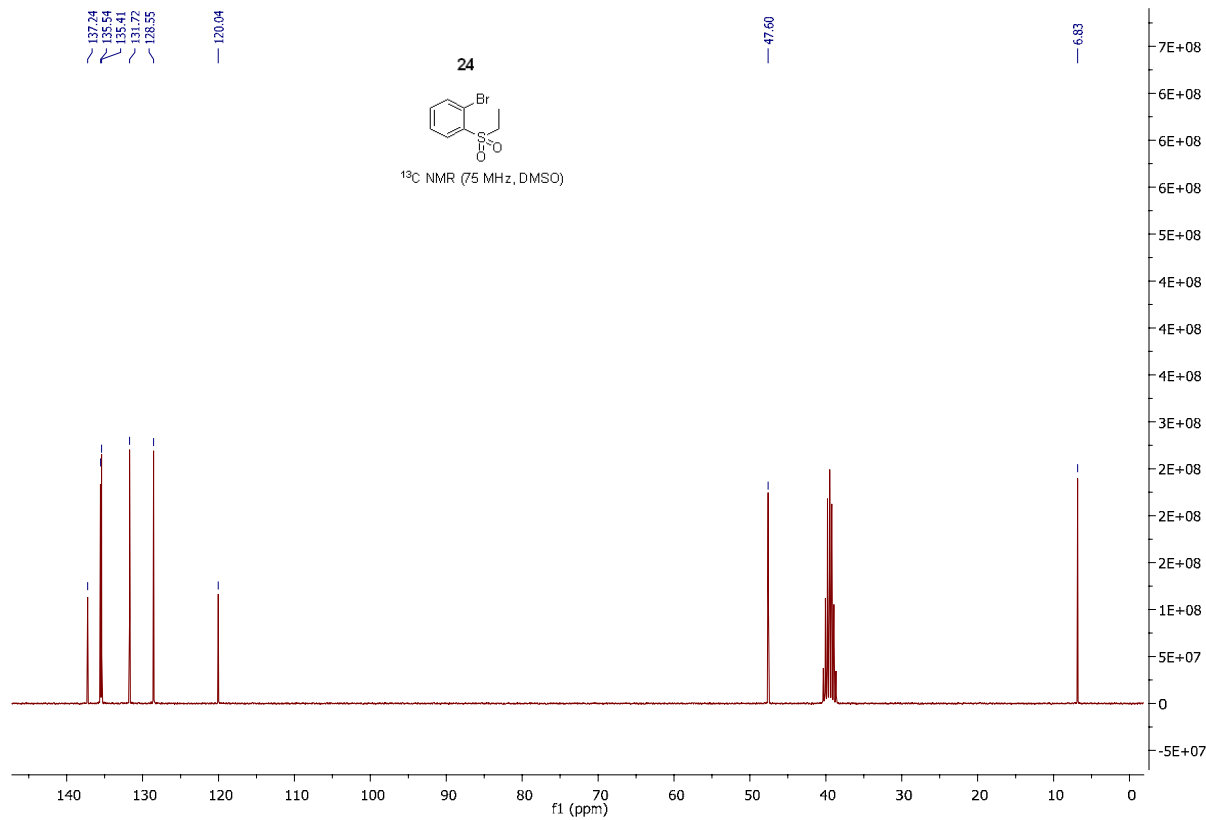

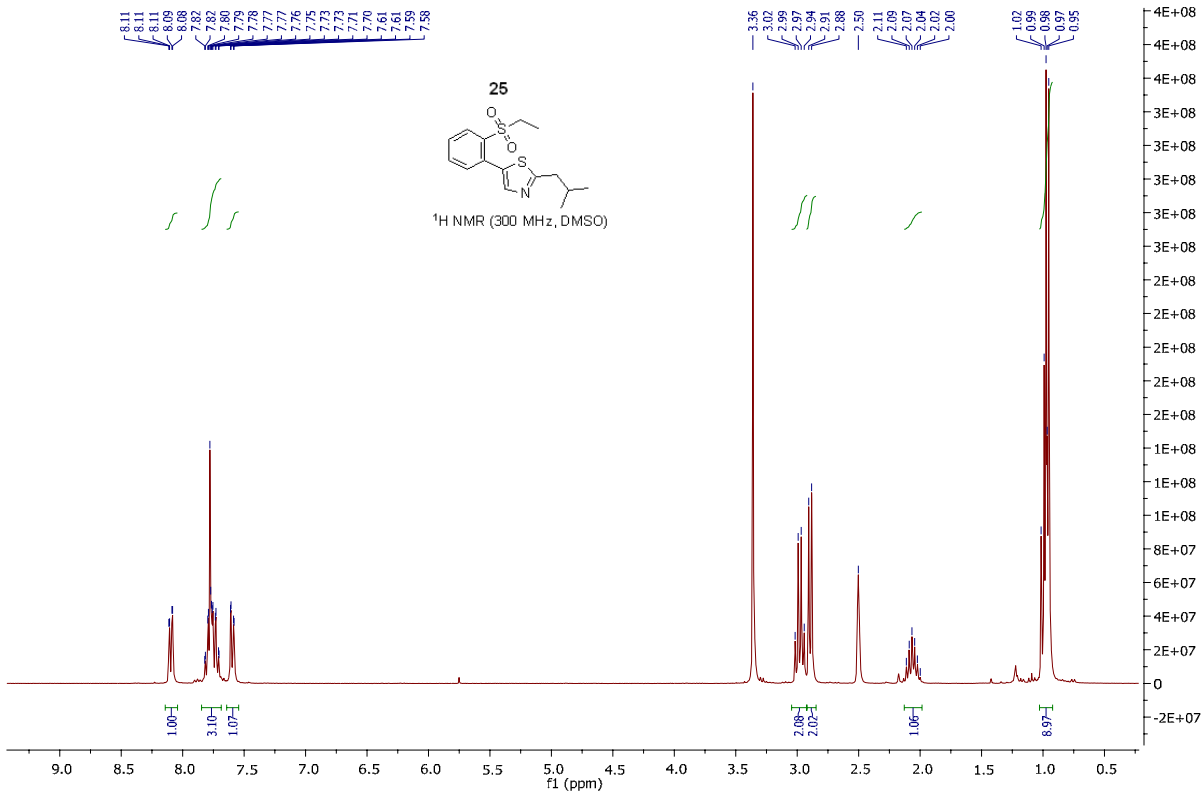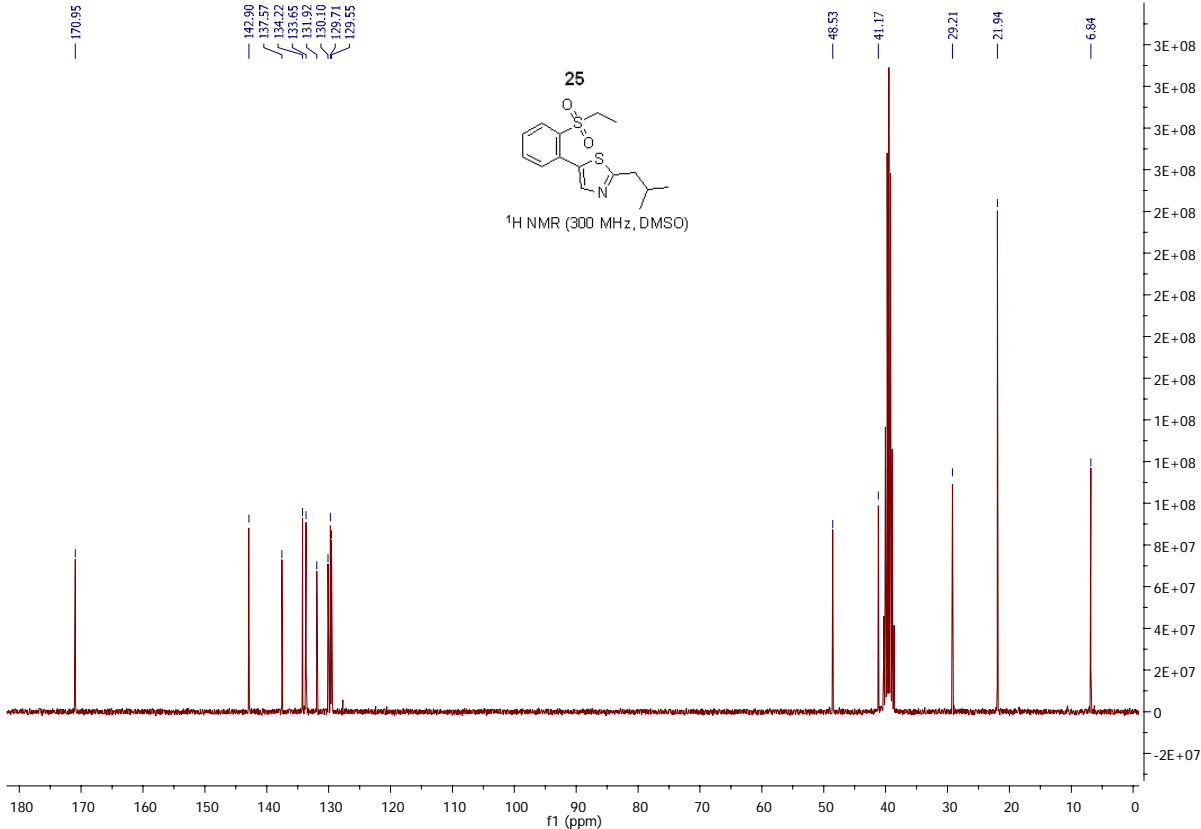

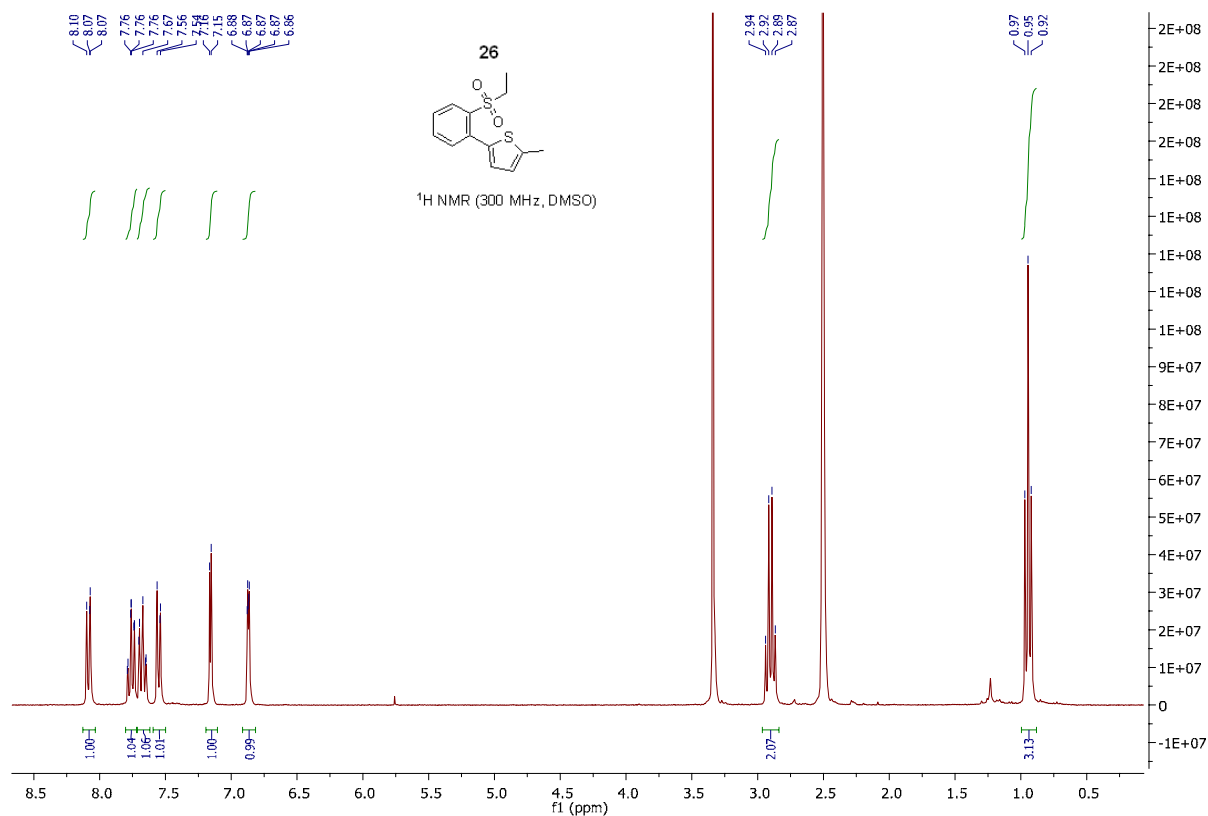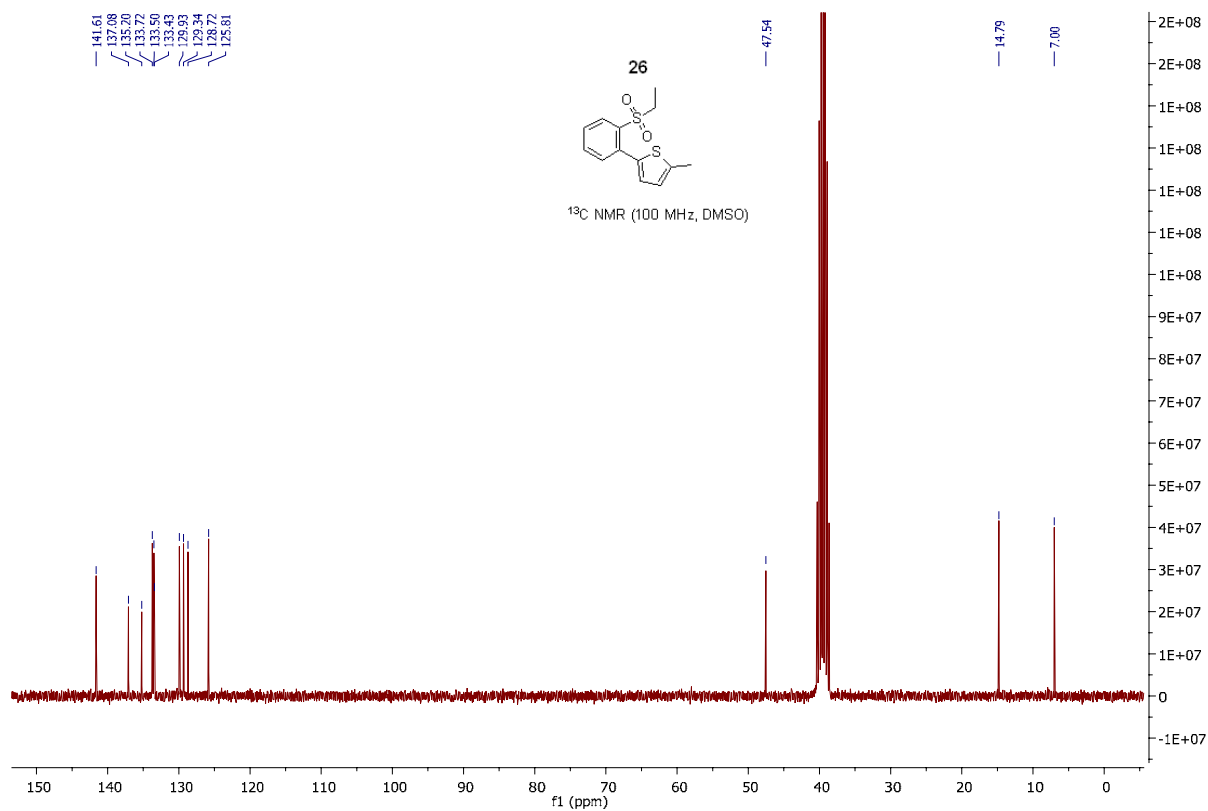

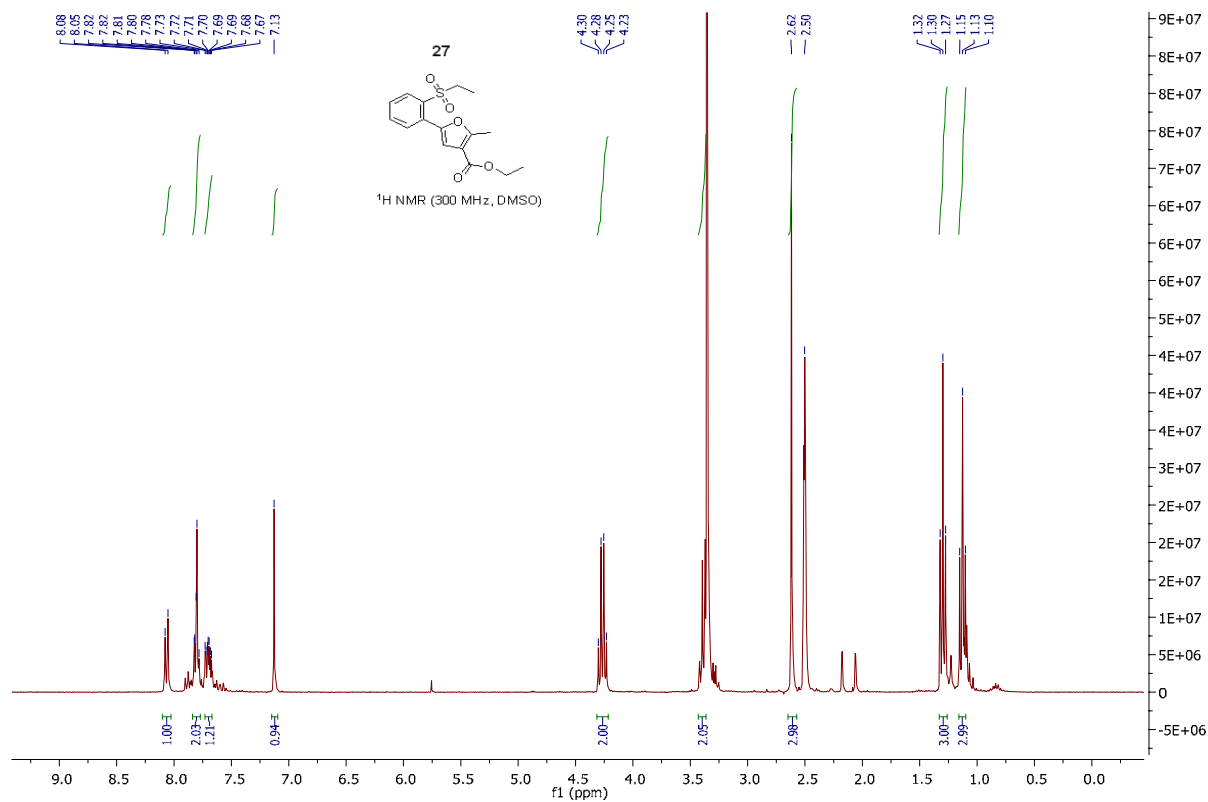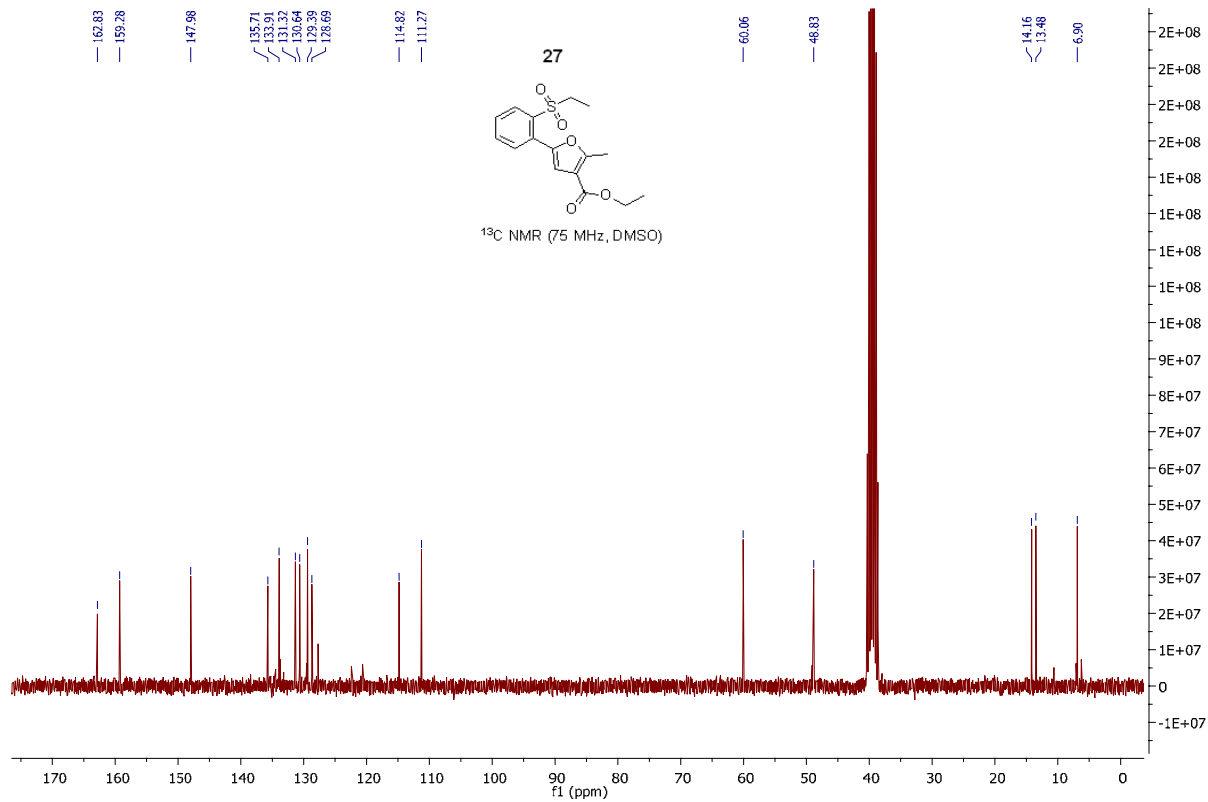

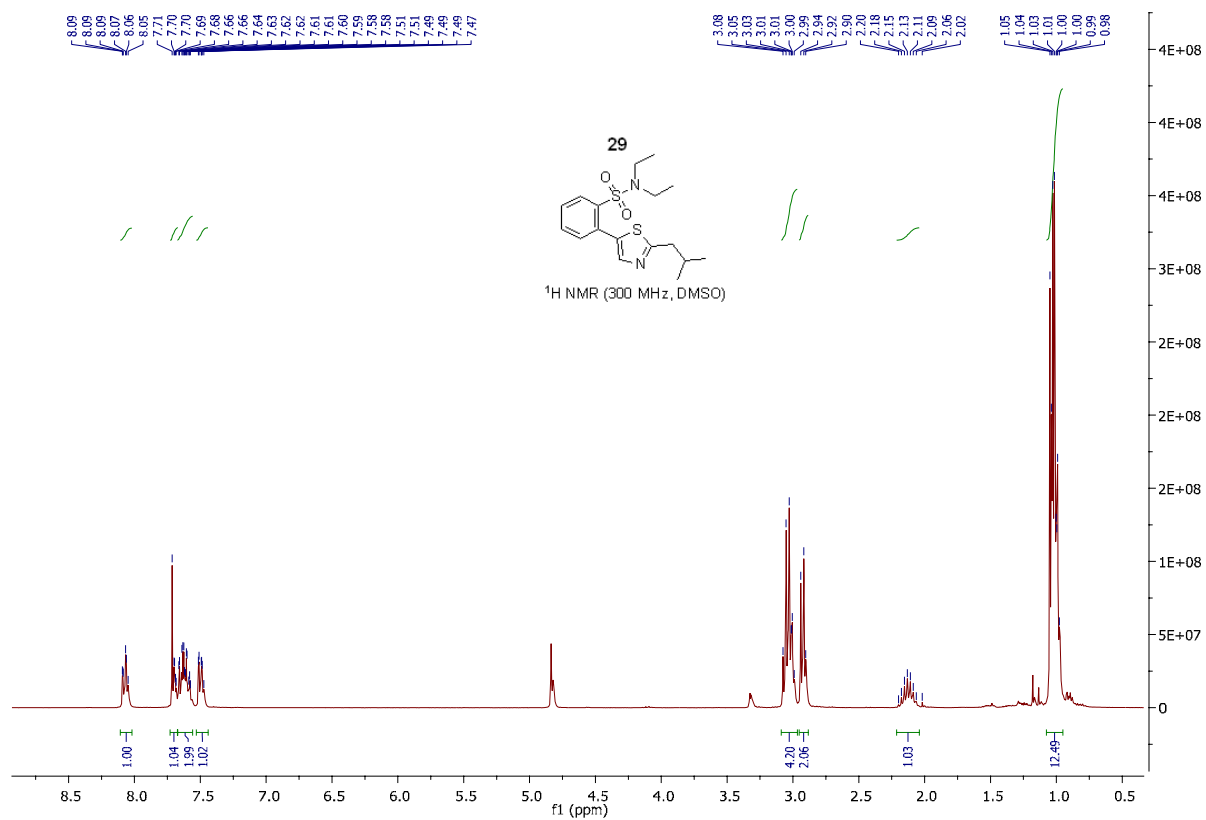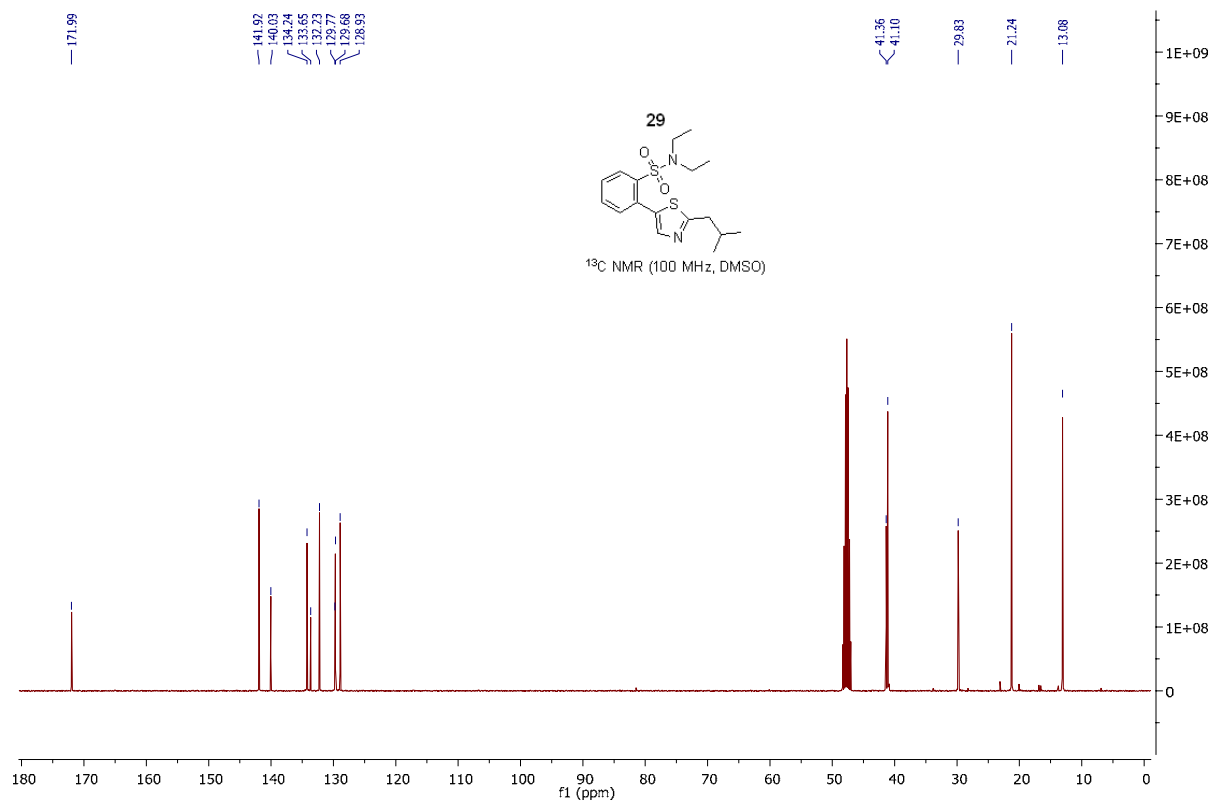

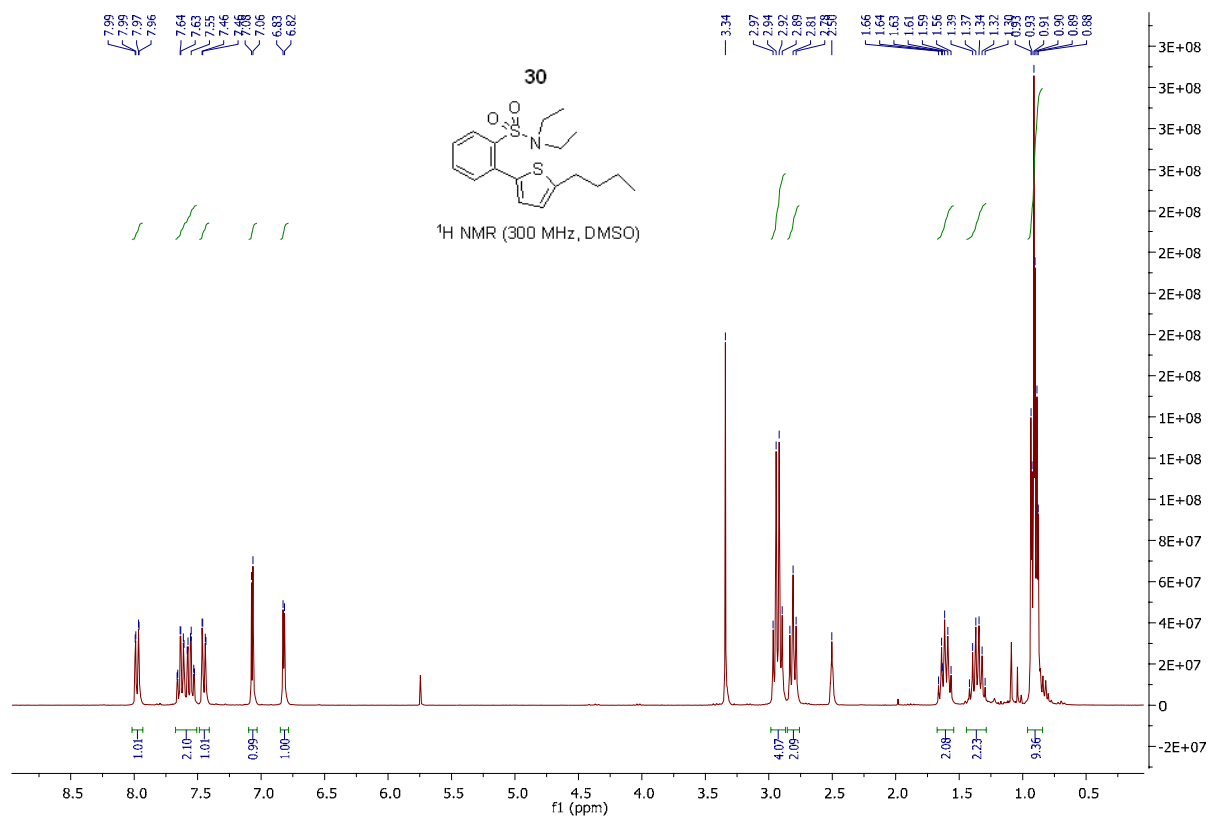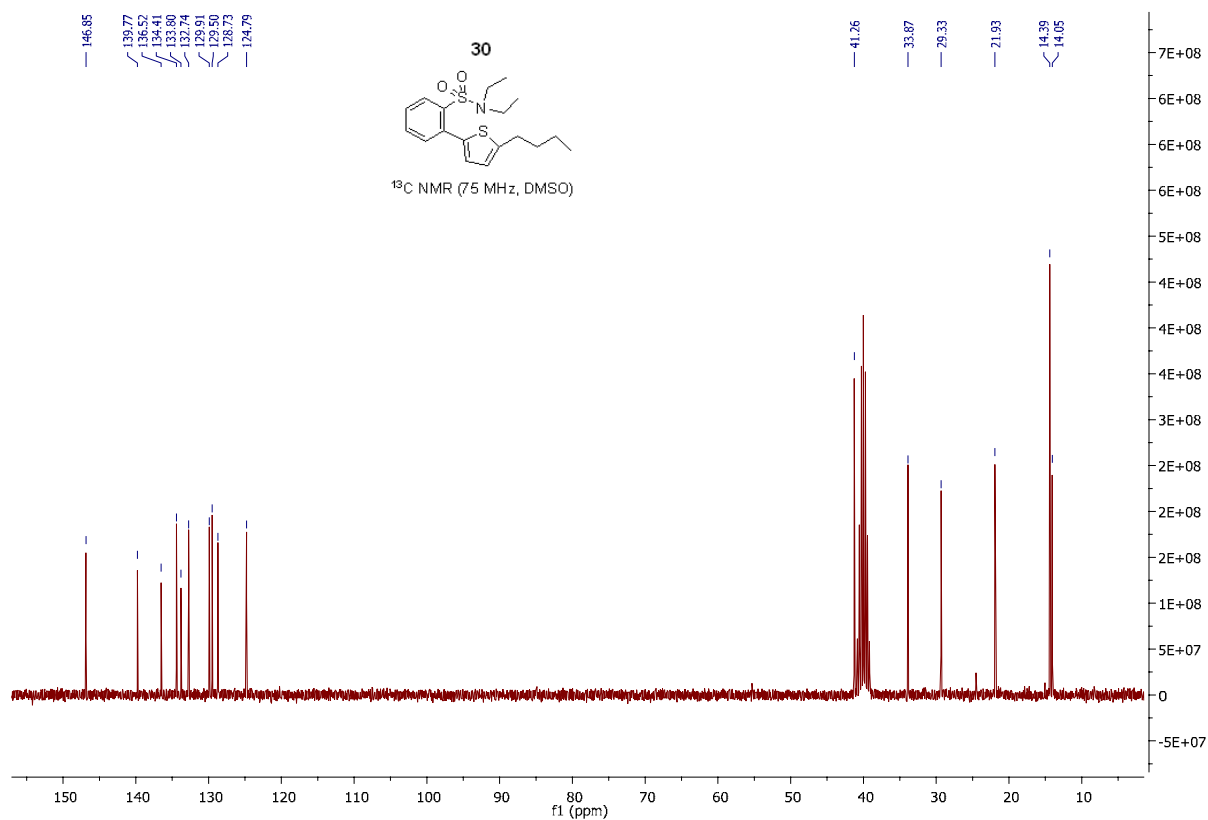

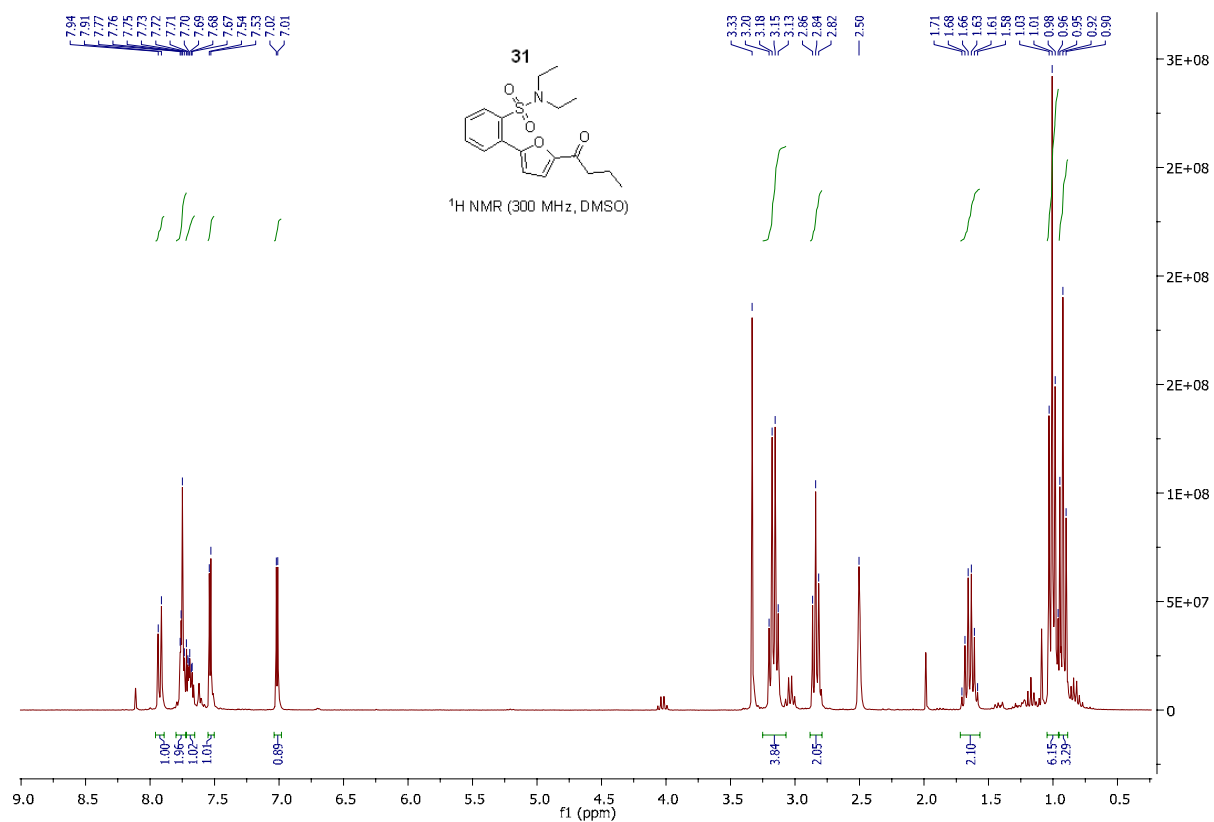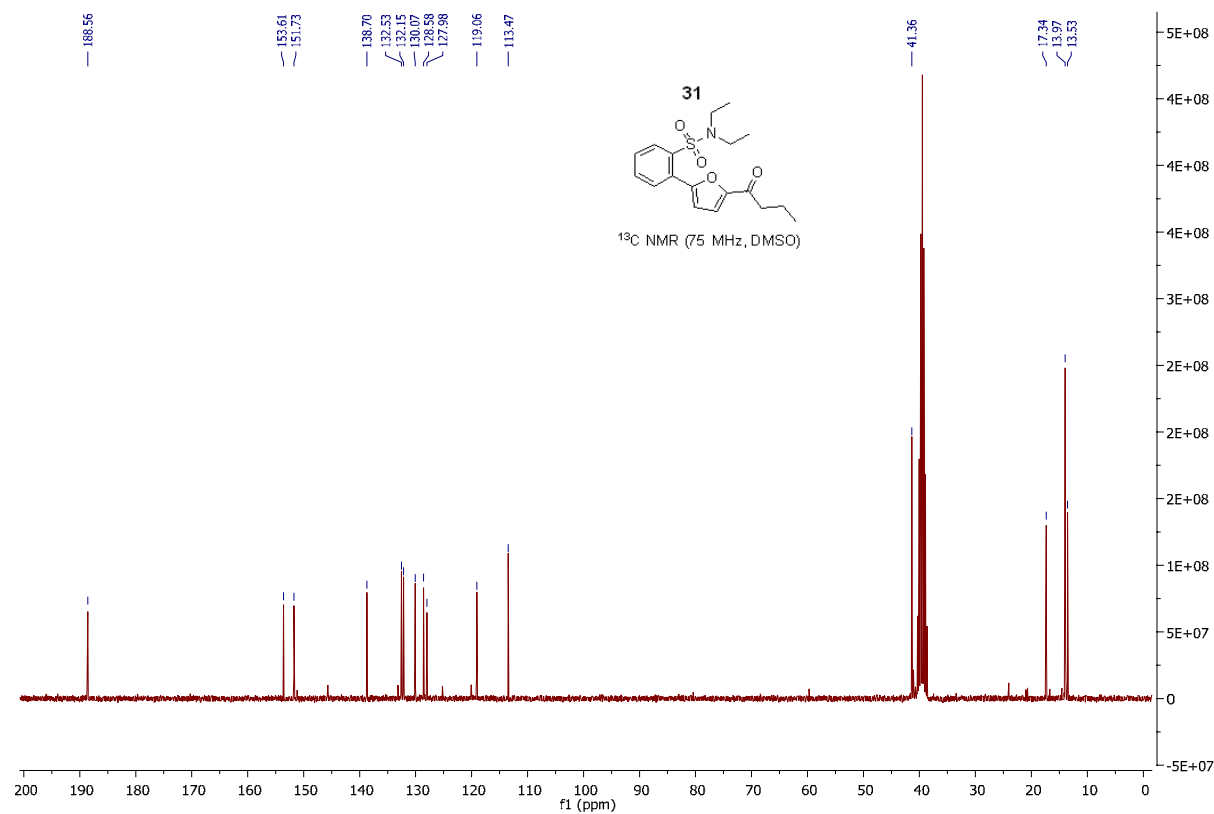

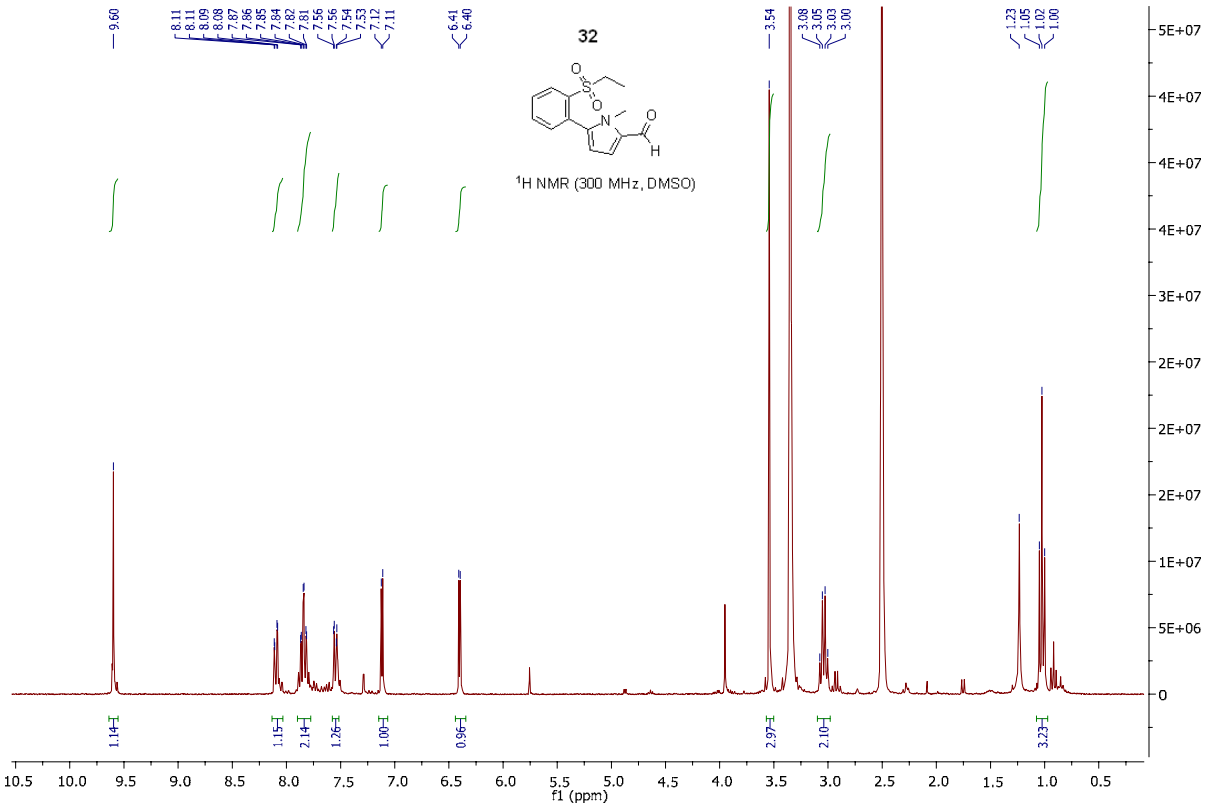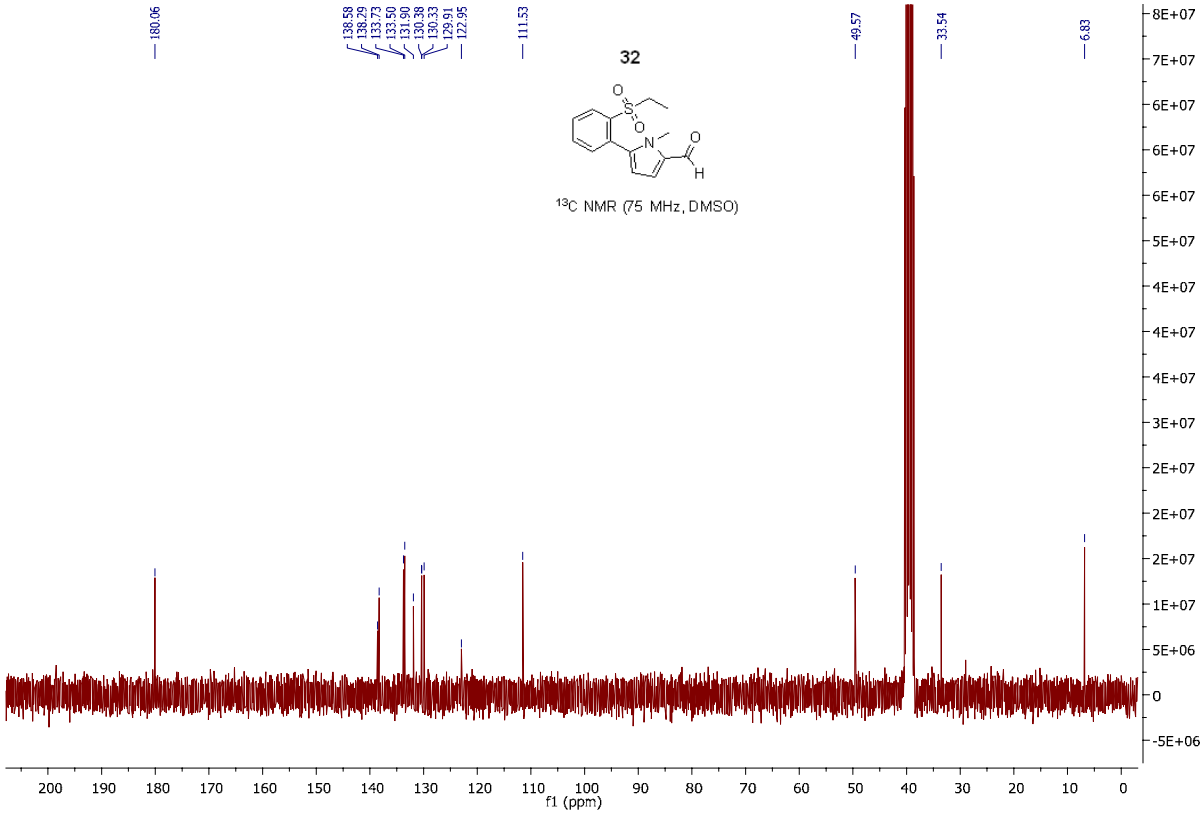

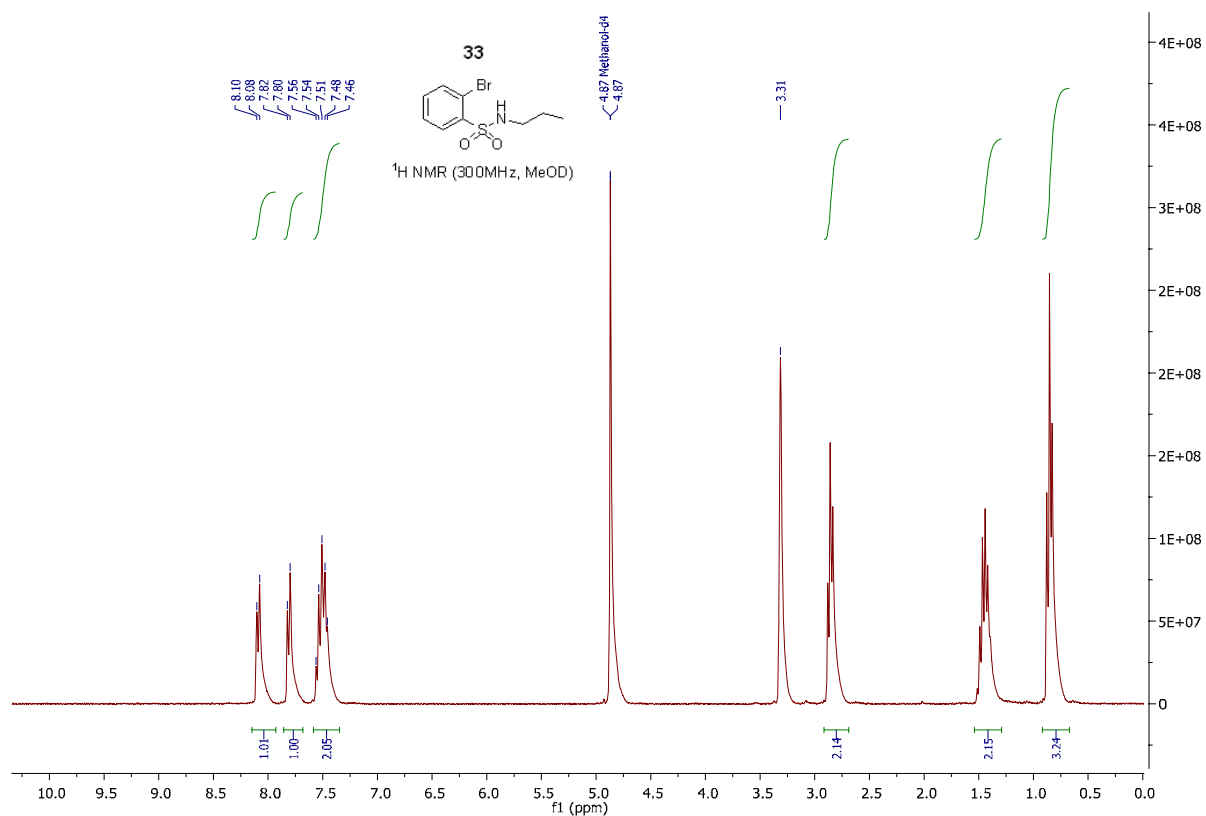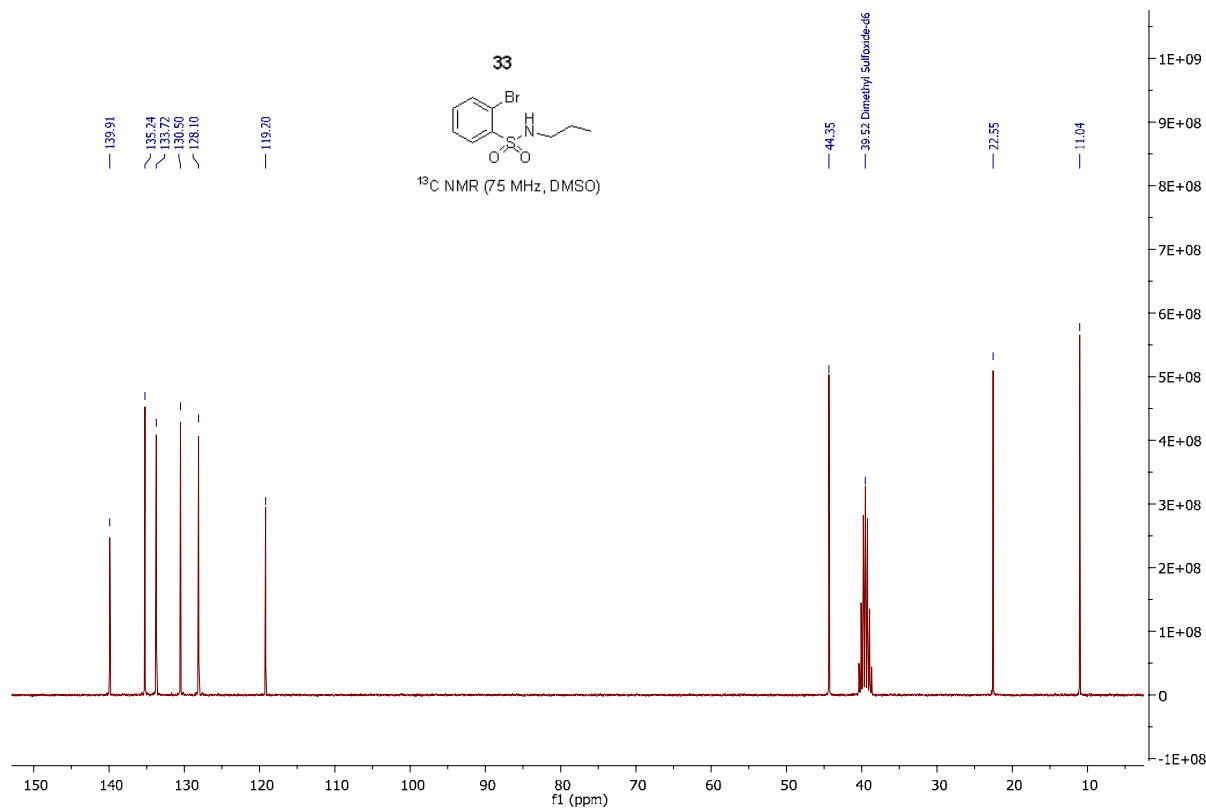

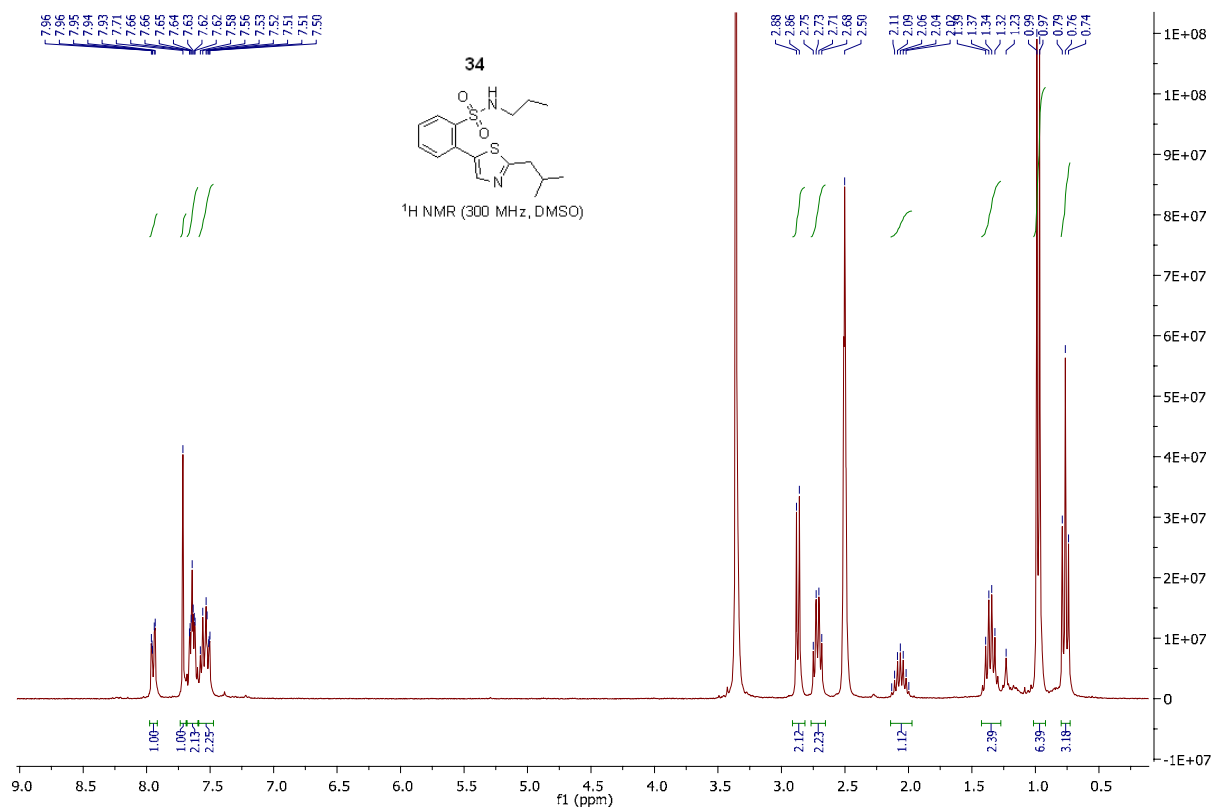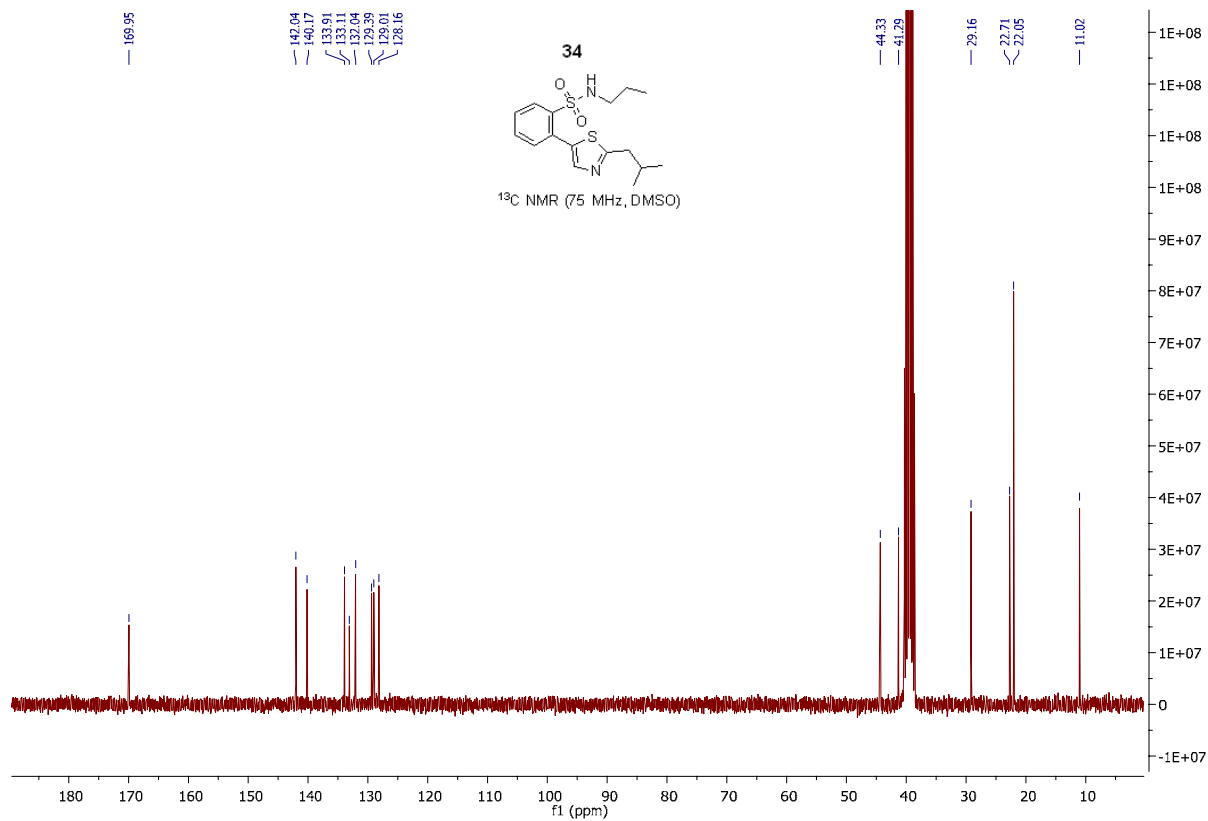

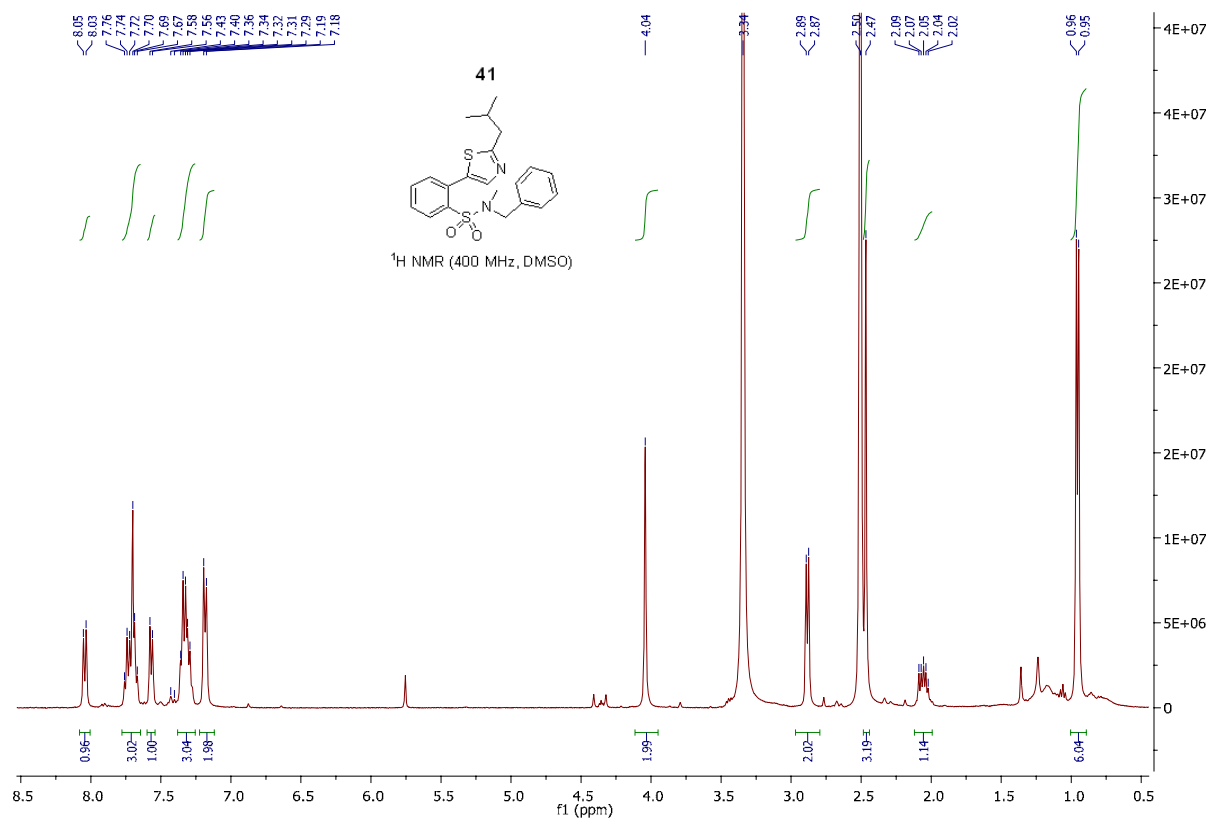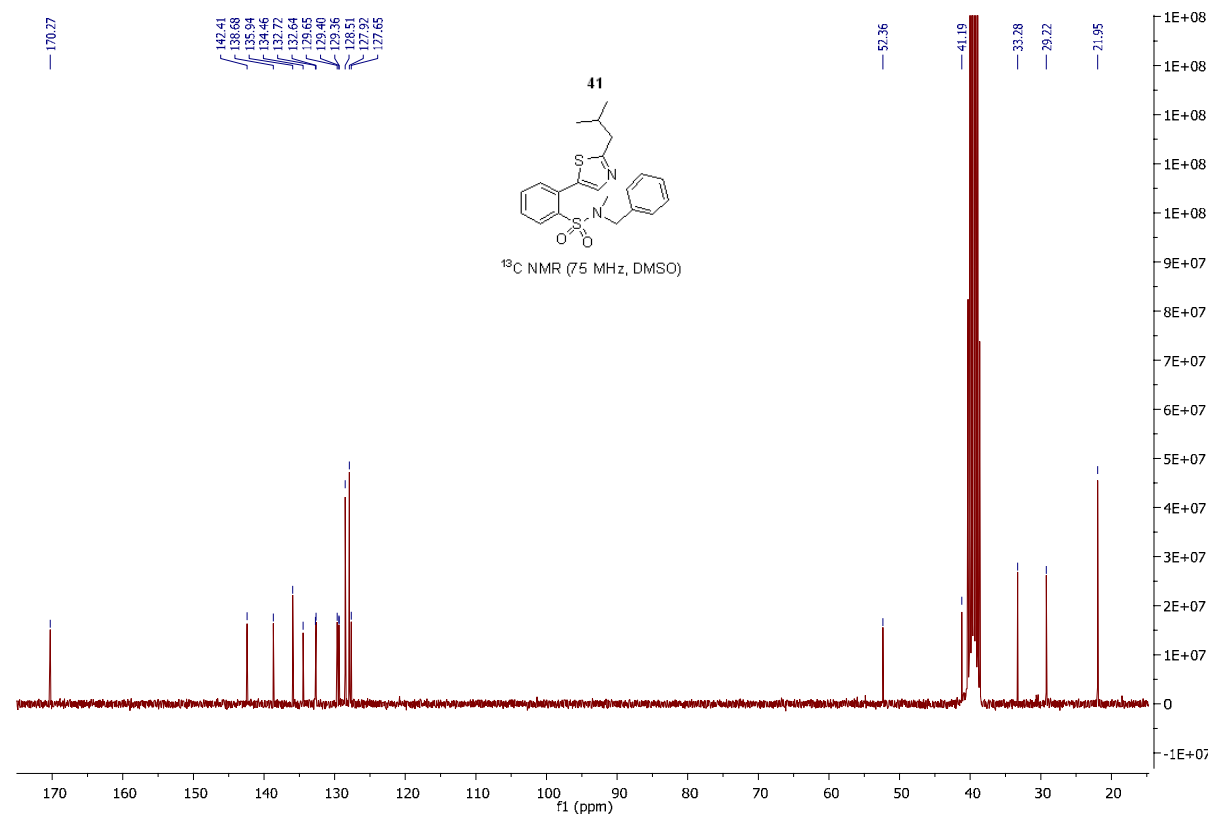

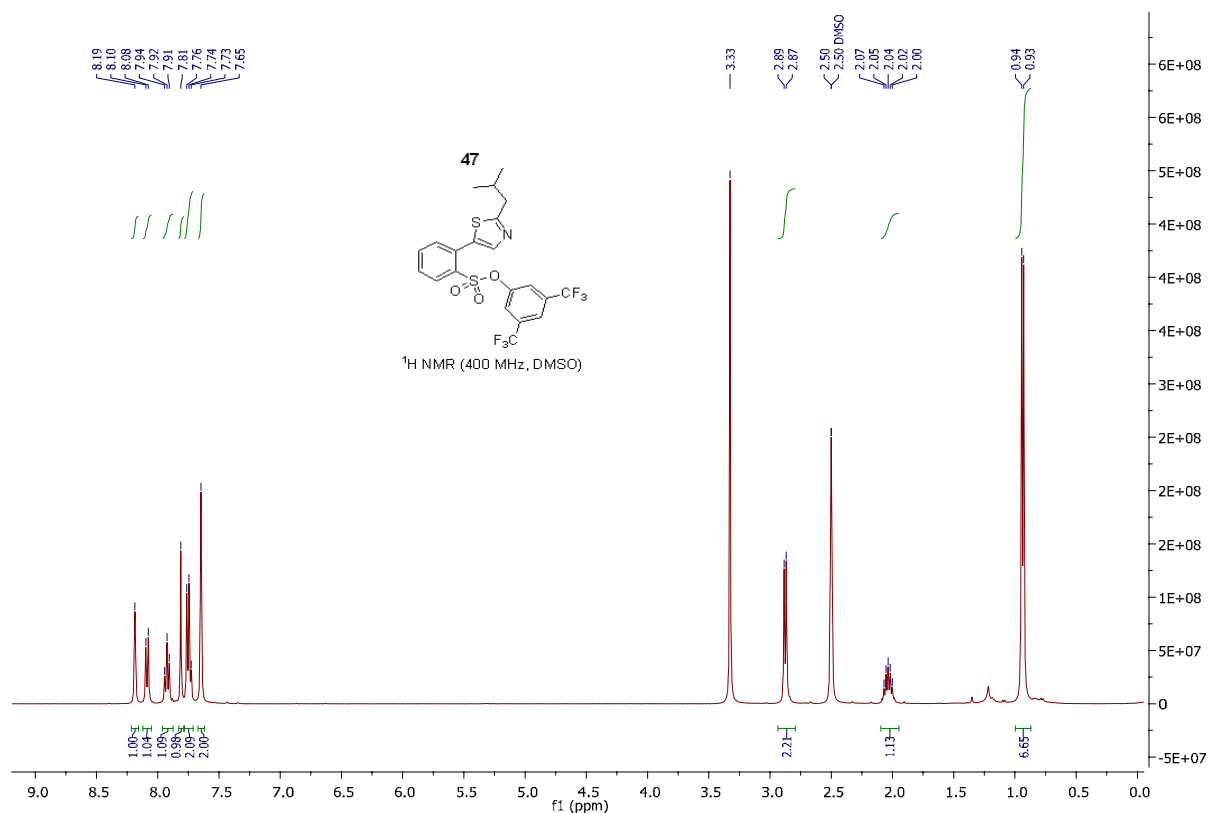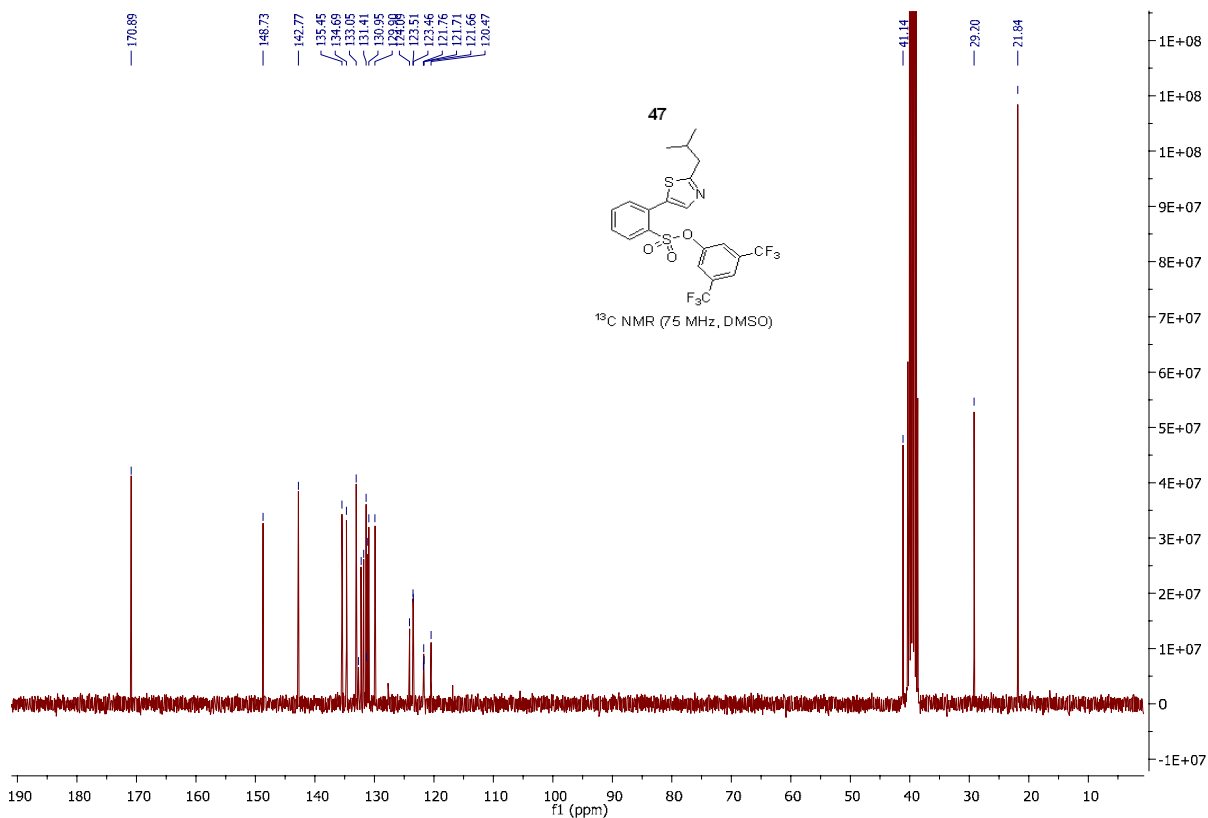

Supplement: c3ra40769a.pdf [file c3ra40769a.pdf]
